# Supplementary material
Source: PubMed Central journal article supplement (PMC3600091)
Supplement: NIHMS431185-supplement-439_2012_1256_MOESM1_ESM.pdf [file NIHMS431185-supplement-439_2012_1256_MOESM1_ESM.pdf]

**SUPPLEMENTAL MATERIAL**

**Supplementary Table 1.** SNPs reaching alpha levels of significance of ( $P < 1.97 \times 10^{-5}$ ) in genome-wide association analyses with VLDL particle diameters in the GOLDN population (n=817).

| Snp        | Chromosome | Gene <sup>a</sup> | GOLDN     |        |       | MESA       |        |       | Combined $P^b$ |            |
|------------|------------|-------------------|-----------|--------|-------|------------|--------|-------|----------------|------------|
|            |            |                   | Position  | Beta   | SE    | $P$        | Beta   | SE    |                | $P$        |
| rs2011688  | 1          | <i>APOB</i>       | 110530927 | -0.058 | 0.012 | 4.42*10-06 | 0.009  | 0.011 | 0.390          | 0.017      |
| rs6711016  | 2          | <i>APOB</i>       | 20986833  | 0.036  | 0.008 | 2.46*10-06 | -0.014 | 0.006 | 0.018          | 0.00003    |
| rs6728178  | 2          | <i>APOB</i>       | 21047434  | 0.043  | 0.008 | 1.95*10-08 | -0.019 | 0.006 | 0.001          | 1.68*10-07 |
| rs11902417 | 2          | <i>APOB</i>       | 21052397  | 0.043  | 0.008 | 2.07*10-08 | -0.019 | 0.006 | 0.001          | 1.11*10-07 |
| rs10184054 | 2          | <i>APOB</i>       | 21057374  | -0.043 | 0.008 | 1.88*10-08 | 0.019  | 0.006 | 0.001          | 1.58*10-07 |
| rs6544366  | 2          | <i>APOB</i>       | 21057522  | -0.043 | 0.008 | 1.88*10-08 | 0.019  | 0.006 | 0.001          | 1.61*10-07 |
| rs4564803  | 2          | <i>APOB</i>       | 21059007  | -0.043 | 0.008 | 1.86*10-08 | 0.019  | 0.006 | 0.001          | 1.20*10-07 |
| rs6754295  | 2          | <i>APOB</i>       | 21059688  | 0.043  | 0.008 | 1.81*10-08 | -0.019 | 0.006 | 0.001          | 1.18*10-07 |
| rs7557067  | 2          | <i>APOB</i>       | 21061717  | -0.044 | 0.008 | 1.74*10-08 | 0.019  | 0.006 | 0.001          | 1.20*10-07 |
| rs1042034  | 2          | <i>APOB</i>       | 21078786  | 0.041  | 0.008 | 2.52*10-07 | -0.016 | 0.006 | 0.009          | 9.65*10-06 |
| rs2678379  | 2          | <i>APOB</i>       | 21080065  | 0.041  | 0.008 | 2.54*10-07 | -0.016 | 0.006 | 0.010          | 0.00001    |
| rs676210   | 2          | <i>APOB</i>       | 21085029  | 0.041  | 0.008 | 2.56*10-07 | -0.016 | 0.006 | 0.011          | 1.49*10-05 |
| rs673548   | 2          |                   | 21091049  | 0.041  | 0.008 | 3.54*10-07 | -0.016 | 0.006 | 0.010          | 0.00001    |
| rs3109315  | 2          |                   | 130101188 | -0.194 | 0.045 | 1.76*10-05 | -0.038 | 0.042 | 0.368          | 0.015      |
| rs12493332 | 3          |                   | 82979462  | 0.054  | 0.011 | 2.74*10-06 | -0.01  | 0.008 | 0.213          | 0.005      |

|            |   |                |           |        |       |            |        |       |       |        |
|------------|---|----------------|-----------|--------|-------|------------|--------|-------|-------|--------|
| rs17020227 | 3 |                | 82989090  | -0.054 | 0.011 | 2.70*10-06 | 0.009  | 0.008 | 0.237 | 0.006  |
| rs17020233 | 3 |                | 83005269  | -0.055 | 0.011 | 1.77*10-06 | 0.01   | 0.008 | 0.235 | 0.006  |
| rs13075335 | 3 |                | 83006051  | -0.055 | 0.011 | 1.74*10-06 | 0.009  | 0.008 | 0.238 | 0.007  |
| rs9309915  | 3 |                | 83008414  | -0.055 | 0.011 | 1.69*10-06 | 0.009  | 0.008 | 0.249 | 0.007  |
| rs12486708 | 3 |                | 83019307  | -0.054 | 0.011 | 1.79*10-06 | 0.008  | 0.008 | 0.312 | 0.011  |
| rs13091263 | 3 |                | 83019739  | -0.054 | 0.011 | 1.78*10-06 | 0.008  | 0.008 | 0.312 | 0.011  |
| rs13094197 | 3 |                | 83041466  | 0.055  | 0.011 | 1.45*10-06 | -0.009 | 0.008 | 0.287 | 0.009  |
| rs13063170 | 3 |                | 83043249  | 0.055  | 0.011 | 1.43*10-06 | -0.008 | 0.008 | 0.295 | 0.010  |
| rs13092936 | 3 |                | 83044768  | -0.054 | 0.012 | 1.18*10-05 | 0.016  | 0.008 | 0.054 | 0.0004 |
| rs6790035  | 3 | <i>M*10COM</i> | 170469774 | 0.162  | 0.034 | 2.32*10-06 | -0.007 | 0.029 | 0.821 | 0.064  |
| rs11915511 | 3 | <i>MDS1</i>    | 170472604 | -0.145 | 0.028 | 3.80*10-07 | 0.007  | 0.023 | 0.752 | 0.055  |
| rs9681698  | 3 | <i>M*10COM</i> | 170477620 | 0.15   | 0.029 | 2.70*10-07 | -0.004 | 0.024 | 0.884 | 0.073  |
| rs6843345  | 4 | <i>TMSL3</i>   | 91979785  | -0.08  | 0.019 | 1.87*10-05 | 0.025  | 0.016 | 0.107 | 0.001  |
| rs3966014  | 4 | <i>GALNT7</i>  | 174294010 | -0.032 | 0.007 | 1.2*10-05  | -0.007 | 0.005 | 0.202 | 0.005  |
| rs2332655  | 4 | <i>GALNT7</i>  | 174329577 | -0.029 | 0.007 | 1.34*10-05 | -0.009 | 0.005 | 0.069 | 0.001  |
| rs4535319  | 4 | <i>GALNT7</i>  | 174363606 | -0.03  | 0.007 | 8.82*10-06 | -0.006 | 0.005 | 0.205 | 0.005  |
| rs10213525 | 4 | <i>GALNT7</i>  | 174366315 | 0.03   | 0.007 | 8.84*10-06 | 0.006  | 0.005 | 0.205 | 0.005  |
| rs10001613 | 4 | <i>GALNT7</i>  | 174368721 | -0.03  | 0.007 | 9.69*10-06 | -0.006 | 0.005 | 0.205 | 0.005  |
| rs17059221 | 4 | <i>GALNT7</i>  | 174384083 | 0.03   | 0.007 | 1.01*10-05 | 0.008  | 0.005 | 0.086 | 0.001  |
| rs9683937  | 4 | <i>GALNT7</i>  | 174392229 | 0.03   | 0.007 | 1.02*10-05 | 0.007  | 0.005 | 0.182 | 0.004  |

|            |    |                |           |        |       |            |        |       |       |       |
|------------|----|----------------|-----------|--------|-------|------------|--------|-------|-------|-------|
| rs9685946  | 4  | <i>GALNT7</i>  | 174392241 | 0.03   | 0.007 | 1.03*10-05 | 0.007  | 0.005 | 0.182 | 0.004 |
| rs13112928 | 4  | <i>GALNT7</i>  | 174394707 | -0.03  | 0.007 | 5.41*10-06 | -0.009 | 0.005 | 0.054 | 0.004 |
| rs7703767  | 5  | <i>MYOT</i>    | 137251906 | 0.208  | 0.044 | 2.85*10-06 | 0.016  | 0.067 | 0.817 | 0.064 |
| rs6569770  | 6  |                | 99578606  | 0.047  | 0.011 | 1.18*10-05 | -0.002 | 0.008 | 0.781 | 0.059 |
| rs9483374  | 6  |                | 99583032  | 0.047  | 0.011 | 1.08*10-05 | -0.002 | 0.008 | 0.781 | 0.059 |
| rs4839737  | 6  |                | 99585025  | -0.047 | 0.011 | 1.04*10-05 | 0.002  | 0.008 | 0.827 | 0.065 |
| rs9483378  | 6  |                | 99586662  | -0.047 | 0.011 | 9.97*10-06 | 0.001  | 0.008 | 0.914 | 0.078 |
| rs9483379  | 6  |                | 99586811  | -0.047 | 0.011 | 9.90*10-06 | 0.001  | 0.008 | 0.914 | 0.078 |
| rs9483380  | 6  |                | 99587013  | 0.047  | 0.011 | 9.81*10-06 | -0.001 | 0.008 | 0.914 | 0.078 |
| rs9321324  | 6  |                | 99589604  | -0.047 | 0.011 | 9.26*10-06 | 0.001  | 0.008 | 0.910 | 0.077 |
| rs9321325  | 6  |                | 99589749  | 0.047  | 0.011 | 9.19*10-06 | 0      | 0.008 | 0.985 | 0.088 |
| rs6938048  | 6  |                | 99590131  | 0.047  | 0.011 | 9.03*10-06 | -0.001 | 0.008 | 0.911 | 0.077 |
| rs9493177  | 6  |                | 99590311  | -0.047 | 0.011 | 8.89*10-06 | 0.001  | 0.008 | 0.911 | 0.077 |
| rs9483382  | 6  |                | 99590420  | 0.049  | 0.011 | 4.28*10-06 | -0.001 | 0.008 | 0.913 | 0.077 |
| rs6925042  | 6  |                | 99604669  | 0.045  | 0.01  | 1.36*10-05 | 0.004  | 0.008 | 0.579 | 0.034 |
| rs9483434  | 6  |                | 99611559  | 0.045  | 0.01  | 1.39*10-05 | 0.004  | 0.008 | 0.604 | 0.037 |
| rs4727625  | 7  | <i>ATXN7L1</i> | 105146931 | -0.031 | 0.007 | 1.71*10-05 | -0.004 | 0.005 | 0.454 | 0.022 |
| rs538249   | 7  |                | 105147257 | 0.032  | 0.007 | 4.34*10-06 | 0      | 0.005 | 0.976 | 0.087 |
| rs3780081  | 8  | <i>AGPAT5</i>  | 6564968   | -0.107 | 0.025 | 1.89*10-05 | -0.002 | 0.023 | 0.936 | 0.081 |
| rs12784903 | 10 | <i>BUB3</i>    | 124946170 | -0.04  | 0.008 | 7.71*10-07 | -0.001 | 0.006 | 0.840 | 0.067 |

|            |    |             |           |        |       |            |        |       |       |       |
|------------|----|-------------|-----------|--------|-------|------------|--------|-------|-------|-------|
| rs11248439 | 10 | <i>BUB3</i> | 124946696 | 0.039  | 0.008 | 1.06*10-06 | 0.001  | 0.006 | 0.876 | 0.072 |
| rs11248440 | 10 | <i>BUB3</i> | 124947144 | -0.039 | 0.008 | 2.33*10-06 | -0.001 | 0.006 | 0.907 | 0.076 |
| rs11248442 | 10 | <i>BUB3</i> | 124949604 | 0.039  | 0.008 | 4.88*10-07 | 0.001  | 0.006 | 0.904 | 0.076 |
| rs2421177  | 10 | <i>BUB3</i> | 124950373 | 0.039  | 0.008 | 5.38*10-07 | 0.001  | 0.006 | 0.845 | 0.068 |
| rs10902900 | 10 | <i>BUB3</i> | 124954909 | -0.032 | 0.007 | 4.36*10-06 | 0      | 0.005 | 0.995 | 0.089 |
| rs1114742  | 10 | <i>BUB3</i> | 124957585 | 0.04   | 0.008 | 4.98*10-07 | 0.002  | 0.006 | 0.774 | 0.058 |
| rs10902901 | 10 | <i>BUB3</i> | 124957712 | -0.031 | 0.007 | 5.07*10-06 | 0.001  | 0.005 | 0.901 | 0.076 |
| rs12763035 | 10 | <i>BUB3</i> | 124957768 | -0.039 | 0.008 | 3.87*10-07 | -0.001 | 0.006 | 0.921 | 0.079 |
| rs752920   | 10 | <i>BUB3</i> | 124962025 | -0.031 | 0.007 | 4.90*10-06 | 0.001  | 0.005 | 0.891 | 0.074 |
| rs17663304 | 10 | <i>BUB3</i> | 124963094 | -0.03  | 0.007 | 1.19*10-05 | 0.002  | 0.005 | 0.647 | 0.042 |
| rs11248451 | 10 | <i>BUB3</i> | 124963883 | 0.04   | 0.008 | 1.69*10-07 | 0.001  | 0.006 | 0.899 | 0.076 |
| rs10902902 | 10 | <i>BUB3</i> | 124964007 | -0.03  | 0.007 | 1.17*10-05 | 0.002  | 0.005 | 0.647 | 0.042 |
| rs10902903 | 10 | <i>BUB3</i> | 124965929 | -0.03  | 0.007 | 1.17*10-05 | 0.002  | 0.005 | 0.661 | 0.044 |
| rs10902904 | 10 | <i>BUB3</i> | 124966686 | -0.03  | 0.007 | 1.17*10-05 | 0.002  | 0.005 | 0.667 | 0.045 |
| rs11248455 | 10 | <i>BUB3</i> | 124967147 | 0.039  | 0.008 | 2.86*10-07 | 0      | 0.006 | 0.942 | 0.082 |
| rs11248456 | 10 | <i>BUB3</i> | 124968369 | -0.039 | 0.008 | 2.86*10-07 | 0      | 0.006 | 0.934 | 0.080 |
| rs12356367 | 10 | <i>BUB3</i> | 124968871 | 0.03   | 0.007 | 1.16*10-05 | -0.002 | 0.005 | 0.683 | 0.047 |
| rs7083581  | 10 | <i>BUB3</i> | 124969919 | 0.03   | 0.007 | 1.11*10-05 | -0.002 | 0.005 | 0.708 | 0.050 |
| rs17663410 | 10 | <i>BUB3</i> | 124970886 | 0.041  | 0.008 | 1.63*10-07 | 0.001  | 0.006 | 0.817 | 0.064 |
| rs10902906 | 10 | <i>BUB3</i> | 124971320 | 0.03   | 0.007 | 1.16*10-05 | -0.002 | 0.005 | 0.766 | 0.057 |

|            |    |                     |           |        |       |            |        |       |       |       |
|------------|----|---------------------|-----------|--------|-------|------------|--------|-------|-------|-------|
| rs10902907 | 10 | <i>BUB3</i>         | 124972490 | 0.03   | 0.007 | 9.65*10-06 | -0.002 | 0.005 | 0.660 | 0.044 |
| rs6578334  | 11 | <i>MRGPRG</i>       | 3198799   | 0.054  | 0.012 | 1.5*10-05  | 0.005  | 0.008 | 0.560 | 0.033 |
| rs4756071  | 11 | <i>LMO2</i>         | 33839292  | -0.228 | 0.052 | 1.46*10-05 | -0.015 | 0.022 | 0.495 | 0.026 |
| rs10082957 | 12 |                     | 58622643  | -0.098 | 0.021 | 5.66*10-06 | 0.005  | 0.017 | 0.771 | 0.058 |
| rs11610152 | 12 |                     | 106918128 | 0.041  | 0.009 | 2.51*10-06 | -0.002 | 0.006 | 0.757 | 0.056 |
| rs7295909  | 12 |                     | 106922115 | -0.041 | 0.009 | 2.25*10-06 | 0.002  | 0.006 | 0.758 | 0.056 |
| rs11616130 | 12 | <i>LOC100129448</i> | 106932209 | -0.041 | 0.009 | 1.94*10-06 | 0.002  | 0.006 | 0.780 | 0.059 |
| rs933890   | 12 | <i>LOC100129448</i> | 106963052 | -0.04  | 0.009 | 3.07*10-06 | 0.002  | 0.006 | 0.731 | 0.053 |
| rs17318085 | 12 | <i>LOC100129448</i> | 106982950 | 0.039  | 0.009 | 6.39*10-06 | -0.003 | 0.006 | 0.685 | 0.047 |
| rs11608785 | 12 | <i>LOC100129448</i> | 106998761 | 0.038  | 0.009 | 1.57*10-05 | -0.002 | 0.006 | 0.708 | 0.050 |
| rs11608789 | 12 | <i>LOC100129448</i> | 106998822 | 0.038  | 0.009 | 1.82*10-05 | -0.003 | 0.006 | 0.678 | 0.046 |
| rs3736859  | 13 | <i>LMO7</i>         | 75306250  | -0.071 | 0.017 | 1.9*10-05  | -0.003 | 0.011 | 0.796 | 0.061 |
| rs12891613 | 14 | <i>KIAA0323</i>     | 23973804  | -0.051 | 0.01  | 6.77*10-07 | -0.002 | 0.008 | 0.828 | 0.065 |
| rs6085781  | 20 |                     | 6896587   | 0.03   | 0.007 | 1.77*10-05 | -0.006 | 0.005 | 0.222 | 0.006 |

Abbreviations: SE = Standard Error; P= P-value.

<sup>a</sup> +/- 50kb of gene <sup>b</sup>Fishers exact test

**Supplementary Table 2.** SNPs reaching alpha levels of significance of ( $P < 1.97 \times 10^{-5}$ ) in genome-wide association analyses with LDL particle diameters in the GOLDN population (n=817).

| Snp        | Chromosome | Position  | Gene <sup>a</sup> | GOLDN  |       |            | MESA   |       |          | Combined P <sup>b</sup> |
|------------|------------|-----------|-------------------|--------|-------|------------|--------|-------|----------|-------------------------|
|            |            |           |                   | Beta   | SE    | P          | Beta   | SE    | P        |                         |
| rs17392930 | 1          | 51526492  | <i>HEATR1</i>     | -0.561 | 0.127 | 1.04*10-05 | <.0001 | 0.002 | 0.97318  | 0.086                   |
| rs965399   | 1          | 234835027 | <i>ARHGAP25</i>   | -0.405 | 0.09  | 7.49*10-06 | -0.003 | 0.001 | 0.058316 | 0.0004                  |
| rs13032797 | 2          | 68854675  | <i>SCN2A</i>      | 0.295  | 0.063 | 3.91*10-06 | -0.002 | 0.001 | 0.11472  | 0.002                   |
| rs6718960  | 2          | 165803974 | <i>SCN2A</i>      | 0.197  | 0.046 | 1.96*10-05 | 0.001  | 0.001 | 0.085262 | 0.001                   |
| rs17182784 | 2          | 165809213 | <i>NOSTRIN</i>    | 0.197  | 0.046 | 1.96*10-05 | 0.001  | 0.001 | 0.086066 | 0.001                   |
| rs482435   | 2          | 169384291 |                   | 0.194  | 0.045 | 1.73*10-05 | <.0001 | 0.001 | 0.8423   | 0.067                   |
| rs2542929  | 2          | 211419838 |                   | 0.199  | 0.046 | 1.47*10-05 | 0.001  | 0.001 | 0.52118  | 0.029                   |
| rs347965   | 3          | 141790619 |                   | 0.244  | 0.055 | 1.17*10-05 | 0.001  | 0.001 | 0.19989  | 0.005                   |
| rs7431736  | 3          | 146256132 |                   | 0.823  | 0.178 | 4.52*10-06 | 0.004  | 0.003 | 0.1812   | 0.004                   |
| rs13082097 | 3          | 146275218 |                   | -0.826 | 0.179 | 4.56*10-06 | -0.007 | 0.004 | 0.10575  | 0.001                   |
| rs12650654 | 4          | 110555319 |                   | -0.618 | 0.135 | 5.50*10-06 | -0.001 | 0.002 | 0.72056  | 0.051                   |
| rs6820806  | 4          | 188962377 | <i>ADCY2</i>      | -0.27  | 0.062 | 1.5*10-05  | -0.002 | 0.001 | 0.15844  | 0.003                   |
| rs1505080  | 5          | 7398847   | <i>ADCY2</i>      | -0.18  | 0.042 | 1.83*10-05 | 0.001  | 0.001 | 0.15017  | 0.003                   |
| rs1505081  | 5          | 7398929   | <i>ADCY2</i>      | -0.18  | 0.042 | 1.69*10-05 | 0.001  | 0.001 | 0.14593  | 0.003                   |
| rs3812025  | 5          | 7400593   | <i>ADCY2</i>      | -0.18  | 0.042 | 1.68*10-05 | 0.001  | 0.001 | 0.14437  | 0.003                   |
| rs1505089  | 5          | 7404342   |                   | 0.191  | 0.042 | 7.98*10-06 | -0.001 | 0.001 | 0.17801  | 0.004                   |

|            |   |          |                |        |       |            |        |       |          |        |
|------------|---|----------|----------------|--------|-------|------------|--------|-------|----------|--------|
| rs10512892 | 5 | 49727032 |                | -0.357 | 0.079 | 7.11*10-06 | <.0001 | 0.001 | 0.76988  | 0.058  |
| rs708010   | 6 | 37071350 | <i>ORC3L</i>   | 0.207  | 0.048 | 1.63*10-05 | <.0001 | 0.001 | 0.88342  | 0.073  |
| rs2307373  | 6 | 88423427 |                | -0.204 | 0.044 | 4.82*10-06 | <.0001 | 0.001 | 0.99938  | 0.090  |
| rs7792941  | 7 | 9030820  |                | 0.266  | 0.057 | 3.11*10-06 | <.0001 | 0.001 | 0.75368  | 0.055  |
| rs10952132 | 7 | 9033345  |                | -0.285 | 0.051 | 2.49*10-08 | <.0001 | 0.001 | 0.88882  | 0.074  |
| rs10952133 | 7 | 9033517  |                | -0.235 | 0.044 | 9.83*10-08 | <.0001 | 0.001 | 0.92808  | 0.080  |
| rs12537711 | 7 | 9041146  |                | 0.275  | 0.055 | 7.21*10-07 | <.0001 | 0.001 | 0.83893  | 0.067  |
| rs11983119 | 7 | 9047577  |                | -0.28  | 0.058 | 1.69*10-06 | <.0001 | 0.001 | 0.77484  | 0.058  |
| rs6463871  | 7 | 9054048  | <i>THSD7A</i>  | 0.291  | 0.059 | 1.10*10-06 | <.0001 | 0.001 | 0.69668  | 0.048  |
| rs7793532  | 7 | 11484295 |                | -0.21  | 0.046 | 6.68*10-06 | -0.001 | 0.001 | 0.080691 | 0.0008 |
| rs706048   | 7 | 16738904 | <i>TSPAN13</i> | -0.183 | 0.041 | 1.07*10-05 | <.0001 | 0.001 | 0.76211  | 0.057  |
| rs706059   | 7 | 16774415 | <i>TSPAN13</i> | -0.184 | 0.041 | 9.63*10-06 | 0.001  | 0.001 | 0.13713  | 0.002  |
| rs706065   | 7 | 16777692 | <i>OSBPL3</i>  | -0.179 | 0.041 | 1.21*10-05 | 0.001  | 0.001 | 0.053602 | 0.0004 |
| rs10238784 | 7 | 24857333 |                | -0.307 | 0.071 | 1.76*10-05 | <.0001 | 0.001 | 0.80796  | 0.063  |
| rs2435272  | 7 | 84845002 |                | 0.196  | 0.043 | 7.25*10-06 | 0.001  | 0.001 | 0.29748  | 0.010  |
| rs2463468  | 7 | 84847285 |                | 0.196  | 0.043 | 7.34*10-06 | 0.001  | 0.001 | 0.30016  | 0.010  |
| rs2463475  | 7 | 84853936 |                | 0.196  | 0.043 | 6.99*10-06 | 0.001  | 0.001 | 0.28904  | 0.010  |
| rs1960550  | 7 | 84862579 |                | 0.197  | 0.043 | 6.45*10-06 | 0.001  | 0.001 | 0.27853  | 0.009  |
| rs2463478  | 7 | 84868528 |                | -0.198 | 0.043 | 6.05*10-06 | -0.001 | 0.001 | 0.29689  | 0.010  |
| rs1583081  | 7 | 84872163 |                | 0.2    | 0.044 | 5.51*10-06 | 0.001  | 0.001 | 0.34099  | 0.013  |

|            |    |           |                       |        |       |            |        |       |         |       |
|------------|----|-----------|-----------------------|--------|-------|------------|--------|-------|---------|-------|
| rs2463480  | 7  | 84874325  |                       | 0.2    | 0.044 | 5.35*10-06 | 0.001  | 0.001 | 0.3464  | 0.013 |
| rs2435264  | 7  | 84874341  |                       | 0.2    | 0.044 | 5.33*10-06 | 0.001  | 0.001 | 0.34656 | 0.013 |
| rs7794512  | 7  | 84883817  | <i>CUX1</i>           | -0.204 | 0.045 | 6.03*10-06 | 0      | 0.001 | 0.65082 | 0.043 |
| rs11540898 | 7  | 101708009 |                       | 0.671  | 0.147 | 5.38*10-06 | 0.001  | 0.002 | 0.66771 | 0.045 |
| rs496037   | 8  | 16679423  |                       | 0.61   | 0.133 | 5.59*10-06 | 0.001  | 0.002 | 0.71382 | 0.050 |
| rs530909   | 8  | 16680945  | <i>COL27A1</i>        | -0.599 | 0.131 | 5.42*10-06 | -0.001 | 0.002 | 0.45528 | 0.022 |
| rs16927834 | 9  | 116088294 | <i>COL27A1</i>        | 0.312  | 0.064 | 1.11*10-06 | 0.001  | 0.001 | 0.31834 | 0.011 |
| rs4978577  | 9  | 116088430 | <i>COL27A1</i>        | -0.313 | 0.063 | 8.98*10-07 | -0.001 | 0.001 | 0.30696 | 0.011 |
| rs1687410  | 9  | 116090841 | <i>COL27A1</i>        | -0.314 | 0.064 | 1.22*10-06 | -0.001 | 0.001 | 0.31143 | 0.011 |
| rs10817583 | 9  | 116091092 | <i>COL27A1</i>        | 0.315  | 0.064 | 1.05*10-06 | 0.001  | 0.001 | 0.3203  | 0.012 |
| rs1249742  | 9  | 116091435 | <i>COL27A1</i>        | -0.327 | 0.064 | 4.65*10-07 | -0.001 | 0.001 | 0.34866 | 0.014 |
| rs1249740  | 9  | 116091860 | <i>FAM99A</i>         | 0.308  | 0.065 | 2.72*10-06 | 0.001  | 0.001 | 0.30379 | 0.010 |
| rs748541   | 11 | 1652592   |                       | 0.228  | 0.045 | 5.51*10-07 | -0.001 | 0.001 | 0.4334  | 0.020 |
| rs7103707  | 11 | 85571084  | <i>BTG4</i>           | -0.281 | 0.063 | 1.08*10-05 | -0.002 | 0.001 | 0.13506 | 0.002 |
| rs11213927 | 11 | 110868371 | <i>TPTE2</i>          | 0.365  | 0.083 | 1.37*10-05 | <.0001 | 0.002 | 0.89117 | 0.074 |
| rs2880301  | 13 | 18998534  |                       | 0.606  | 0.057 | 5.85*10-25 | <.0001 | 0.001 | 0.68348 | 0.047 |
| rs8002785  | 13 | 33621850  |                       | 0.203  | 0.046 | 9.61*10-06 | <.0001 | 0.001 | 0.62426 | 0.040 |
| rs12876644 | 13 | 33623977  |                       | -0.18  | 0.041 | 1.51*10-05 | -0.001 | 0.001 | 0.13427 | 0.002 |
| rs4142811  | 13 | 33624266  |                       | -0.204 | 0.047 | 1.37*10-05 | <.0001 | 0.001 | 0.78602 | 0.060 |
| rs8181839  | 13 | 33626853  | <i>MIR548F5,DCLK1</i> | -0.203 | 0.046 | 1.05*10-05 | <.0001 | 0.001 | 0.71396 | 0.050 |



|            |    |          |                  |        |       |            |        |       |          |            |
|------------|----|----------|------------------|--------|-------|------------|--------|-------|----------|------------|
| rs9531159  | 13 | 35368336 | <i>TRIM9</i>     | 0.329  | 0.076 | 1.93*10-05 | 0.001  | 0.001 | 0.45587  | 0.022      |
| rs4609754  | 14 | 50588675 | <i>TRIM9</i>     | 0.262  | 0.06  | 1.36*10-05 | 0.002  | 0.001 | 0.06344  | 0.0005     |
| rs12101017 | 14 | 50598979 | <i>TRIM9</i>     | 0.258  | 0.06  | 1.62*10-05 | 0.002  | 0.001 | 0.051871 | 0.0003     |
| rs4606614  | 14 | 50599720 | <i>TRIM9</i>     | -0.258 | 0.06  | 1.62*10-05 | -0.002 | 0.001 | 0.051949 | 0.0003     |
| rs2999394  | 14 | 50629779 | <i>MAPKBP1</i>   | -0.187 | 0.041 | 6.14*10-06 | -0.002 | 0.001 | 0.011154 | 1.55*10-05 |
| rs11635086 | 15 | 39877393 |                  | 1.096  | 0.245 | 8.60*10-06 | 0.001  | 0.003 | 0.80996  | 0.063      |
| rs903979   | 15 | 45375049 | <i>UNC13C</i>    | 0.479  | 0.11  | 1.4*10-05  | -0.001 | 0.002 | 0.57171  | 0.034      |
| rs2725597  | 15 | 52075173 | <i>LOC728222</i> | 0.309  | 0.068 | 5.59*10-06 | 0.002  | 0.001 | 0.15183  | 0.003      |
| rs4781878  | 16 | 18042947 | <i>LOC728222</i> | -0.177 | 0.041 | 1.91*10-05 | <.0001 | 0.001 | 0.74744  | 0.055      |
| rs12598040 | 16 | 18044767 | <i>QPRT</i>      | 0.177  | 0.041 | 1.96*10-05 | <.0001 | 0.001 | 0.64904  | 0.043      |
| rs9922666  | 16 | 29606126 | <i>QPRT</i>      | -0.233 | 0.048 | 1.20*10-06 | -0.001 | 0.001 | 0.43498  | 0.020      |
| rs9923341  | 16 | 29606211 |                  | -0.217 | 0.047 | 4.10*10-06 | -0.001 | 0.001 | 0.44395  | 0.021      |
| rs16950148 | 16 | 77883391 |                  | 0.481  | 0.088 | 6.36*10-08 | 0.003  | 0.001 | 0.021076 | 5.51*10-05 |
| rs12934695 | 16 | 77886109 |                  | -0.48  | 0.091 | 1.67*10-07 | -0.003 | 0.001 | 0.024891 | 7.68*10-05 |
| rs8054083  | 16 | 77897298 |                  | 0.431  | 0.093 | 4.00*10-06 | 0.002  | 0.001 | 0.064077 | 0.0005     |
| rs4888950  | 16 | 77904730 |                  | -0.404 | 0.083 | 1.38*10-06 | -0.001 | 0.001 | 0.25795  | 0.008      |
| rs17654551 | 16 | 77906341 |                  | -0.357 | 0.079 | 7.66*10-06 | -0.001 | 0.001 | 0.32435  | 0.012      |
| rs7186445  | 16 | 77915296 |                  | 0.36   | 0.08  | 8.42*10-06 | 0.001  | 0.001 | 0.28758  | 0.009      |
| rs2221705  | 16 | 77919912 | <i>MC5R/RNMT</i> | -0.359 | 0.081 | 9.21*10-06 | -0.001 | 0.001 | 0.2671   | 0.008      |
| rs9949908  | 18 | 13790956 | <i>MC5R/RNMT</i> | 0.285  | 0.066 | 1.57*10-05 | -0.002 | 0.001 | 0.060161 | 0.0004     |

|            |    |          |                  |        |       |            |        |       |          |        |
|------------|----|----------|------------------|--------|-------|------------|--------|-------|----------|--------|
| rs1785081  | 18 | 13791209 | <i>MC5R/RNMT</i> | 0.236  | 0.053 | 1.15*10-05 | -0.001 | 0.001 | 0.53159  | 0.030  |
| rs1284074  | 18 | 13791306 | <i>MC5R/RNMT</i> | -0.236 | 0.053 | 1.15*10-05 | 0.001  | 0.001 | 0.53148  | 0.030  |
| rs948271   | 18 | 13793024 |                  | -0.286 | 0.066 | 1.52*10-05 | 0.002  | 0.001 | 0.060198 | 0.0004 |
| rs5003334  | 18 | 47771188 |                  | -0.217 | 0.049 | 1.04*10-05 | -0.001 | 0.001 | 0.32558  | 0.012  |
| rs8094211  | 18 | 47799572 | <i>TCF4</i>      | -0.215 | 0.05  | 1.65*10-05 | -0.001 | 0.001 | 0.3038   | 0.010  |
| rs17511755 | 18 | 51300720 | <i>TCF4</i>      | 0.449  | 0.102 | 1.32*10-05 | 0.001  | 0.002 | 0.64551  | 0.042  |
| rs9960767  | 18 | 51306000 | <i>TCF4</i>      | -0.414 | 0.091 | 5.86*10-06 | -0.002 | 0.002 | 0.25649  | 0.008  |
| rs12327270 | 18 | 51319071 |                  | -0.415 | 0.091 | 5.99*10-06 | -0.002 | 0.002 | 0.21913  | 0.006  |
| rs11666603 | 19 | 12357934 |                  | -0.225 | 0.05  | 7.81*10-06 | <.0001 | 0.001 | 0.62742  | 0.040  |
| rs946371   | 20 | 23077794 |                  | -0.209 | 0.048 | 1.56*10-05 | -0.001 | 0.001 | 0.30071  | 0.010  |
| rs56840    | 20 | 53480643 |                  | -0.266 | 0.061 | 1.42*10-05 | -0.002 | 0.001 | 0.12729  | 0.002  |
| rs212600   | 20 | 53488072 |                  | 0.259  | 0.049 | 1.53*10-07 | <.0001 | 0.001 | 0.70375  | 0.049  |

---

Abbreviations: SE = Standard Error; P= P-value.

<sup>a</sup> +/- 50kb of gene <sup>b</sup>Fishers exact test

**Supplementary Table 3.** SNPs reaching alpha levels of significance of ( $P < 1.97 \times 10^{-5}$ ) in genome-wide association analyses with HDL particle diameters in the GOLDN population (n=817).

| Snp        | Chromosome | Gene <sup>a</sup> | Position        | GOLDN  |       |            | MESA   |       |          | Combined P <sup>b</sup> |
|------------|------------|-------------------|-----------------|--------|-------|------------|--------|-------|----------|-------------------------|
|            |            |                   |                 | Beta   | SE    | P          | Beta   | SE    | P        |                         |
| rs12409803 | 1          | 4093286           |                 | -0.1   | 0.021 | 3.54*10-06 | <.0001 | 0.001 | 0.89924  | 0.075                   |
| rs6663939  | 1          | 4097116           |                 | 0.099  | 0.021 | 3.87*10-06 | <.0001 | 0.001 | 0.92975  | 0.080                   |
| rs10915445 | 1          | 4097502           |                 | -0.099 | 0.021 | 3.89*10-06 | <.0001 | 0.001 | 0.93024  | 0.080                   |
| rs12143662 | 1          | 4102853           | <i>Clorf130</i> | 0.098  | 0.021 | 3.95*10-06 | <.0001 | 0.001 | 0.9578   | 0.084                   |
| rs2809963  | 1          | 24762037          |                 | 0.11   | 0.025 | 1.37*10-05 | <.0001 | 0.002 | 0.84429  | 0.069                   |
| rs427614   | 1          | 25274024          |                 | 0.125  | 0.021 | 3.25*10-09 | <.0001 | 0.001 | 0.99734  | 0.090                   |
| rs380337   | 1          | 25274437          | <i>KCNQ4</i>    | -0.125 | 0.021 | 3.08*10-09 | <.0001 | 0.001 | 0.9988   | 0.090                   |
| rs11806175 | 1          | 41065556          | <i>KCNQ4</i>    | -0.217 | 0.048 | 7.00*10-06 | 0.007  | 0.003 | 0.053408 | 0.0004                  |
| rs11801911 | 1          | 41066444          | <i>VAV3-ASI</i> | 0.217  | 0.048 | 7.00*10-06 | -0.007 | 0.003 | 0.053408 | 0.0004                  |
| rs1571965  | 1          | 108321052         | <i>ACTN2</i>    | -0.27  | 0.061 | 1*10-05    | -0.004 | 0.004 | 0.28873  | 0.009                   |
| rs10925170 | 1          | 234842272         |                 | -0.179 | 0.039 | 4.02*10-06 | -0.002 | 0.002 | 0.36224  | 0.015                   |
| rs11896089 | 2          | 16088590          |                 | 0.097  | 0.021 | 4.72*10-06 | -0.001 | 0.001 | 0.52317  | 0.029                   |
| rs4233975  | 2          | 61752645          | <i>PDE1A</i>    | 0.143  | 0.033 | 1.91*10-05 | -0.001 | 0.002 | 0.53853  | 0.030                   |
| rs1430148  | 2          | 182980944         | <i>PDE1A</i>    | -0.115 | 0.027 | 1.67*10-05 | <.0001 | 0.002 | 0.97114  | 0.086                   |
| rs1430147  | 2          | 182981190         | <i>PDE1A</i>    | -0.115 | 0.027 | 1.67*10-05 | <.0001 | 0.002 | 0.97226  | 0.086                   |
| rs10497600 | 2          | 182988539         | <i>PDE1A</i>    | 0.12   | 0.027 | 9.53*10-06 | <.0001 | 0.002 | 0.84156  | 0.067                   |

|            |   |           |               |        |       |            |        |       |         |        |
|------------|---|-----------|---------------|--------|-------|------------|--------|-------|---------|--------|
| rs17356152 | 2 | 183000937 | <i>PDE1A</i>  | -0.109 | 0.024 | 8.70*10-06 | <.0001 | 0.002 | 0.90694 | 0.076  |
| rs17265027 | 2 | 183001658 | <i>PDE1A</i>  | 0.122  | 0.026 | 2.69*10-06 | -0.001 | 0.002 | 0.74042 | 0.054  |
| rs11686025 | 2 | 183002216 | <i>PDE1A</i>  | 0.11   | 0.024 | 7.32*10-06 | <.0001 | 0.002 | 0.76191 | 0.057  |
| rs1946815  | 2 | 183006405 | <i>PDE1A</i>  | -0.116 | 0.024 | 2.09*10-06 | <.0001 | 0.001 | 0.91841 | 0.078  |
| rs1583114  | 2 | 183007454 | <i>PDE1A</i>  | 0.123  | 0.026 | 2.28*10-06 | -0.001 | 0.002 | 0.6901  | 0.047  |
| rs10207132 | 2 | 183008891 | <i>PDE1A</i>  | -0.122 | 0.026 | 2.99*10-06 | 0.001  | 0.002 | 0.62301 | 0.040  |
| rs17356166 | 2 | 183009004 | <i>PDE1A</i>  | 0.122  | 0.027 | 6.33*10-06 | <.0001 | 0.002 | 0.91872 | 0.078  |
| rs13407156 | 2 | 183010436 | <i>PDE1A</i>  | 0.122  | 0.026 | 2.73*10-06 | -0.001 | 0.002 | 0.64377 | 0.042  |
| rs17356207 | 2 | 183016072 | <i>PDE1A</i>  | -0.125 | 0.026 | 1.58*10-06 | 0.001  | 0.002 | 0.56072 | 0.033  |
| rs16823254 | 2 | 183017527 | <i>PDE1A</i>  | 0.123  | 0.027 | 5.50*10-06 | <.0001 | 0.002 | 0.96721 | 0.085  |
| rs16823257 | 2 | 183019625 | <i>PDE1A</i>  | -0.123 | 0.026 | 2.31*10-06 | 0.001  | 0.002 | 0.58793 | 0.036  |
| rs1367203  | 2 | 183019768 | <i>PDE1A</i>  | -0.125 | 0.026 | 1.58*10-06 | 0.001  | 0.002 | 0.56072 | 0.033  |
| rs1125184  | 2 | 183029091 |               | 0.114  | 0.025 | 5.63*10-06 | -0.001 | 0.002 | 0.69234 | 0.048  |
| rs17044542 | 3 | 6316499   | <i>SH3BP5</i> | 0.243  | 0.056 | 1.81*10-05 | -0.004 | 0.003 | 0.18358 | 0.004  |
| rs3773474  | 3 | 15274032  | <i>SH3BP5</i> | 0.334  | 0.073 | 4.76*10-06 | -0.001 | 0.005 | 0.83775 | 0.067  |
| rs6771876  | 3 | 15274231  | <i>SH3BP5</i> | 0.332  | 0.072 | 5.46*10-06 | -0.001 | 0.005 | 0.83782 | 0.0667 |
| rs9813606  | 3 | 15275659  | <i>SH3BP5</i> | -0.322 | 0.072 | 8.59*10-06 | 0.001  | 0.005 | 0.84132 | 0.067  |
| rs9817868  | 3 | 15276056  | <i>SH3BP5</i> | -0.322 | 0.072 | 8.59*10-06 | 0.001  | 0.005 | 0.84511 | 0.068  |
| rs6442508  | 3 | 15279745  | <i>SH3BP5</i> | -0.322 | 0.072 | 8.40*10-06 | <.0001 | 0.005 | 0.96523 | 0.085  |
| rs9310472  | 3 | 15281603  | <i>SH3BP5</i> | -0.323 | 0.071 | 5.96*10-06 | <.0001 | 0.005 | 0.9638  | 0.085  |

|            |   |           |                 |        |       |            |        |       |         |       |
|------------|---|-----------|-----------------|--------|-------|------------|--------|-------|---------|-------|
| rs6788936  | 3 | 15284929  | <i>SH3BP5</i>   | -0.323 | 0.072 | 8.89*10-06 | -0.003 | 0.005 | 0.62174 | 0.039 |
| rs6808313  | 3 | 15289028  | <i>ROBO2</i>    | -0.327 | 0.073 | 8.28*10-06 | -0.003 | 0.005 | 0.51865 | 0.028 |
| rs17015072 | 3 | 77326908  | <i>RNF13</i>    | 0.225  | 0.049 | 4.21*10-06 | -0.002 | 0.004 | 0.57338 | 0.034 |
| rs3911489  | 3 | 151154829 | <i>SORCS2</i>   | 0.173  | 0.038 | 7.84*10-06 | -0.001 | 0.002 | 0.80264 | 0.062 |
| rs2359630  | 4 | 7755695   | <i>SORCS2</i>   | -0.103 | 0.024 | 1.56*10-05 | -0.002 | 0.001 | 0.23519 | 0.006 |
| rs2253959  | 4 | 7755718   |                 | -0.103 | 0.023 | 1.03*10-05 | -0.001 | 0.001 | 0.3794  | 0.016 |
| rs13127852 | 4 | 166043348 |                 | -0.112 | 0.026 | 1.9*10-05  | -0.001 | 0.002 | 0.52732 | 0.029 |
| rs4429695  | 4 | 166055510 | <i>ADAMTS16</i> | 0.114  | 0.024 | 2.26*10-06 | <.0001 | 0.001 | 0.77624 | 0.058 |
| rs2913645  | 5 | 5304790   | <i>ADAMTS16</i> | 0.219  | 0.05  | 1.27*10-05 | 0.001  | 0.003 | 0.82299 | 0.065 |
| rs10044817 | 5 | 5326945   |                 | -0.198 | 0.045 | 1.13*10-05 | <.0001 | 0.003 | 0.96194 | 0.084 |
| rs1505089  | 5 | 7404342   |                 | 0.093  | 0.022 | 1.92*10-05 | -0.001 | 0.001 | 0.6507  | 0.043 |
| rs10941111 | 5 | 19229209  |                 | 0.117  | 0.026 | 8.35*10-06 | 0.002  | 0.002 | 0.17447 | 0.004 |
| rs6452462  | 5 | 81845214  |                 | -0.103 | 0.023 | 8.84*10-06 | 0.001  | 0.002 | 0.42501 | 0.020 |
| rs9293305  | 5 | 81885502  | <i>EDIL3</i>    | 0.107  | 0.023 | 4.65*10-06 | -0.001 | 0.002 | 0.45457 | 0.022 |
| rs1159734  | 5 | 83565119  |                 | -0.144 | 0.033 | 1.03*10-05 | 0.001  | 0.002 | 0.70436 | 0.049 |
| rs10075540 | 5 | 121149963 |                 | -0.34  | 0.069 | 9.87*10-07 | <.0001 | 0.018 | 0.98609 | 0.089 |
| rs17148434 | 5 | 121154291 |                 | -0.338 | 0.068 | 9.63*10-07 | -0.001 | 0.007 | 0.87899 | 0.072 |
| rs13436296 | 5 | 121158963 |                 | 0.332  | 0.067 | 9.18*10-07 | 0.005  | 0.007 | 0.41354 | 0.019 |
| rs13436690 | 5 | 121160978 | <i>FTMT</i>     | -0.332 | 0.067 | 9.24*10-07 | -0.003 | 0.019 | 0.87638 | 0.072 |
| rs10055277 | 5 | 121165582 | <i>FTMT</i>     | -0.332 | 0.067 | 9.24*10-07 | -0.004 | 0.019 | 0.82882 | 0.065 |

|            |   |           |               |        |       |            |        |       |          |        |
|------------|---|-----------|---------------|--------|-------|------------|--------|-------|----------|--------|
| rs7702652  | 5 | 121166687 | <i>FTMT</i>   | -0.332 | 0.067 | 9.24*10-07 | -0.005 | 0.019 | 0.80559  | 0.062  |
| rs6863862  | 5 | 121182873 | <i>FTMT</i>   | 0.335  | 0.068 | 8.89*10-07 | 0.005  | 0.007 | 0.46868  | 0.024  |
| rs7736854  | 5 | 121183420 | <i>FTMT</i>   | -0.337 | 0.068 | 8.66*10-07 | -0.01  | 0.019 | 0.60489  | 0.038  |
| rs1431941  | 5 | 121184304 | <i>SNCAIP</i> | -0.338 | 0.068 | 8.64*10-07 | -0.013 | 0.019 | 0.49734  | 0.026  |
| rs2737089  | 5 | 121811695 | <i>B3GAT2</i> | 0.101  | 0.021 | 2.35*10-06 | -0.001 | 0.001 | 0.48436  | 0.025  |
| rs1111994  | 6 | 71733654  | <i>B3GAT2</i> | -0.135 | 0.03  | 1.02*10-05 | 0.004  | 0.002 | 0.034894 | 0.0002 |
| rs10455718 | 6 | 71737765  | <i>B3GAT2</i> | -0.135 | 0.03  | 1.01*10-05 | 0.004  | 0.002 | 0.034254 | 0.0001 |
| rs10455231 | 6 | 71740199  |               | -0.135 | 0.03  | 1*10-05    | 0.004  | 0.002 | 0.034007 | 0.0001 |
| rs7741861  | 6 | 75510983  |               | -0.376 | 0.083 | 7.34*10-06 | -0.004 | 0.005 | 0.41123  | 0.019  |
| rs10943727 | 6 | 81361963  |               | 0.1    | 0.022 | 6.62*10-06 | -0.002 | 0.001 | 0.17645  | 0.004  |
| rs1840334  | 6 | 81363214  |               | 0.1    | 0.022 | 6.41*10-06 | -0.002 | 0.001 | 0.15535  | 0.003  |
| rs6926124  | 6 | 81366399  |               | 0.1    | 0.022 | 6.23*10-06 | -0.002 | 0.001 | 0.15374  | 0.003  |
| rs13207647 | 6 | 81370887  |               | -0.095 | 0.022 | 1.5*10-05  | 0.002  | 0.001 | 0.15816  | 0.003  |
| rs2061040  | 6 | 81375074  | <i>NKAIN2</i> | -0.097 | 0.022 | 1.37*10-05 | 0.002  | 0.001 | 0.15807  | 0.003  |
| rs2326102  | 6 | 125173739 |               | -0.372 | 0.083 | 8.80*10-06 | 0.003  | 0.006 | 0.58486  | 0.034  |
| rs1413600  | 6 | 125315827 | <i>RNF217</i> | 0.105  | 0.022 | 2.10*10-06 | 0.001  | 0.001 | 0.66429  | 0.044  |
| rs9388398  | 6 | 125374510 | <i>RNF217</i> | -0.109 | 0.022 | 1.02*10-06 | -0.001 | 0.001 | 0.24969  | 0.007  |
| rs1413598  | 6 | 125378498 | <i>REPS1</i>  | 0.107  | 0.022 | 1.53*10-06 | 0.001  | 0.001 | 0.29011  | 0.010  |
| rs17068040 | 6 | 139269499 | <i>REPS1</i>  | 0.43   | 0.076 | 1.95*10-08 | <.0001 | 0.005 | 0.91462  | 0.078  |
| rs4895549  | 6 | 139302986 |               | 0.446  | 0.079 | 2.25*10-08 | -0.001 | 0.005 | 0.84654  | 0.068  |

|            |   |           |                |        |       |            |        |       |         |             |
|------------|---|-----------|----------------|--------|-------|------------|--------|-------|---------|-------------|
| rs2609299  | 6 | 168551609 |                | -0.135 | 0.031 | 1.63*10-05 | -0.001 | 0.002 | 0.6266  | 0.034       |
| rs7792941  | 7 | 9030820   |                | 0.144  | 0.029 | 5.79*10-07 | -0.002 | 0.002 | 0.16344 | 0.003       |
| rs10952132 | 7 | 9033345   |                | -0.143 | 0.026 | 3.95*10-08 | <.0001 | 0.002 | 0.86805 | 0.071       |
| rs12537711 | 7 | 9041146   |                | 0.148  | 0.028 | 1.54*10-07 | -0.001 | 0.002 | 0.76632 | 0.057       |
| rs245661   | 7 | 9045314   |                | 0.122  | 0.028 | 1.35*10-05 | -0.001 | 0.002 | 0.42625 | 0.020       |
| rs11983119 | 7 | 9047577   |                | -0.153 | 0.029 | 2.30*10-07 | 0.001  | 0.002 | 0.73794 | 0.053       |
| rs6463871  | 7 | 9054048   | <i>SCIN</i>    | 0.158  | 0.03  | 1.67*10-07 | -0.001 | 0.002 | 0.647   | 0.042       |
| rs2529784  | 7 | 12633733  | <i>SCIN</i>    | 0.109  | 0.025 | 1.55*10-05 | -0.001 | 0.001 | 0.73094 | 0.053       |
| rs2529786  | 7 | 12638127  | <i>SCIN</i>    | -0.112 | 0.024 | 5.40*10-06 | 0.001  | 0.001 | 0.52003 | 0.028       |
| rs740415   | 7 | 12639395  | <i>SCIN</i>    | -0.11  | 0.024 | 7.72*10-06 | 0.001  | 0.001 | 0.54077 | 0.031       |
| rs2691816  | 7 | 12642712  | <i>SCIN</i>    | -0.11  | 0.024 | 7.97*10-06 | 0.001  | 0.001 | 0.55066 | 0.032       |
| rs2529780  | 7 | 12643453  | <i>SCIN</i>    | 0.11   | 0.024 | 8.06*10-06 | -0.001 | 0.001 | 0.55308 | 0.031868719 |
| rs2529781  | 7 | 12644370  | <i>SCIN</i>    | 0.11   | 0.024 | 8.24*10-06 | -0.001 | 0.001 | 0.55643 | 0.032       |
| rs2074866  | 7 | 12646979  | <i>TSPAN13</i> | -0.112 | 0.025 | 8.39*10-06 | 0.001  | 0.001 | 0.59252 | 0.036       |
| rs1168056  | 7 | 16765791  | <i>TSPAN13</i> | 0.09   | 0.021 | 1.53*10-05 | -0.001 | 0.001 | 0.60526 | 0.038       |
| rs1168055  | 7 | 16766986  | <i>CREB5</i>   | -0.091 | 0.021 | 1.3*10-05  | 0.001  | 0.001 | 0.67167 | 0.045       |
| rs41298    | 7 | 28635305  | <i>CRHR2</i>   | -0.112 | 0.024 | 5.11*10-06 | <.0001 | 0.001 | 0.94871 | 0.084       |
| rs12701020 | 7 | 30661486  | <i>CUX1</i>    | -0.183 | 0.043 | 1.87*10-05 | 0.001  | 0.003 | 0.67234 | 0.046       |
| rs11540898 | 7 | 101708009 |                | 0.355  | 0.074 | 2.01*10-06 | <.0001 | 0.004 | 0.91036 | 0.077       |
| rs6467756  | 7 | 137624169 |                | -0.169 | 0.039 | 1.27*10-05 | 0.001  | 0.002 | 0.61325 | 0.038       |

|            |    |           |                 |        |       |            |        |       |         |       |
|------------|----|-----------|-----------------|--------|-------|------------|--------|-------|---------|-------|
| rs12551119 | 9  | 75921222  | <i>COL27A1</i>  | -0.143 | 0.033 | 1.48*10-05 | -0.001 | 0.002 | 0.33915 | 0.013 |
| rs16927834 | 9  | 116088294 | <i>COL27A1</i>  | 0.145  | 0.032 | 7.56*10-06 | 0.001  | 0.002 | 0.66335 | 0.044 |
| rs4978577  | 9  | 116088430 | <i>COL27A1</i>  | -0.145 | 0.032 | 6.71*10-06 | -0.001 | 0.002 | 0.65664 | 0.043 |
| rs1687410  | 9  | 116090841 | <i>COL27A1</i>  | -0.146 | 0.033 | 7.98*10-06 | -0.001 | 0.002 | 0.65629 | 0.043 |
| rs10817583 | 9  | 116091092 | <i>COL27A1</i>  | 0.146  | 0.032 | 7.33*10-06 | 0.001  | 0.002 | 0.67473 | 0.046 |
| rs1249742  | 9  | 116091435 | <i>COL27A1</i>  | -0.143 | 0.033 | 1.43*10-05 | -0.001 | 0.002 | 0.76812 | 0.057 |
| rs1249740  | 9  | 116091860 |                 | 0.149  | 0.033 | 8.25*10-06 | 0.001  | 0.002 | 0.51139 | 0.028 |
| rs827267   | 10 | 72399314  | <i>CBARA1</i>   | -0.27  | 0.06  | 7.46*10-06 | -0.001 | 0.003 | 0.80776 | 0.063 |
| rs7893285  | 10 | 73800394  | <i>ARHGAP19</i> | -0.329 | 0.073 | 7.64*10-06 | 0.003  | 0.003 | 0.31904 | 0.011 |
| rs17412719 | 10 | 99024825  | <i>ARHGAP19</i> | 0.099  | 0.023 | 1.89*10-05 | 0.002  | 0.001 | 0.29588 | 0.010 |
| rs701821   | 10 | 99028552  | <i>ARHGAP19</i> | 0.099  | 0.023 | 1.89*10-05 | 0.002  | 0.001 | 0.29401 | 0.010 |
| rs1253401  | 10 | 99040260  | <i>TLX1</i>     | 0.1    | 0.023 | 1.67*10-05 | 0.002  | 0.001 | 0.29436 | 0.010 |
| rs2859746  | 10 | 102886021 |                 | -0.568 | 0.12  | 2.49*10-06 | 0.024  | 0.015 | 0.11478 | 0.002 |
| rs748541   | 11 | 1652592   | <i>LMO1</i>     | 0.104  | 0.023 | 6.52*10-06 | -0.002 | 0.001 | 0.1001  | 0.001 |
| rs11041826 | 11 | 8227978   | <i>LMO1</i>     | 0.136  | 0.031 | 1.26*10-05 | -0.001 | 0.002 | 0.76683 | 0.057 |
| rs4606466  | 11 | 8270731   | <i>LMO1</i>     | -0.106 | 0.024 | 1.06*10-05 | -0.002 | 0.001 | 0.15686 | 0.003 |
| rs11041862 | 11 | 8284642   | <i>LMO1</i>     | 0.101  | 0.022 | 3.38*10-06 | 0.002  | 0.001 | 0.10578 | 0.001 |
| rs10840015 | 11 | 8284673   | <i>LMO1</i>     | 0.104  | 0.022 | 2.38*10-06 | 0.002  | 0.001 | 0.11185 | 0.002 |
| rs7947764  | 11 | 8285210   | <i>LMO1</i>     | -0.096 | 0.022 | 1.5*10-05  | -0.001 | 0.001 | 0.32837 | 0.012 |
| rs7936966  | 11 | 8285230   | <i>LMO1</i>     | 0.096  | 0.022 | 1.5*10-05  | 0.002  | 0.001 | 0.26222 | 0.008 |



|            |    |           |                |        |       |            |        |       |          |       |
|------------|----|-----------|----------------|--------|-------|------------|--------|-------|----------|-------|
| rs4758330  | 11 | 8285769   | <i>LMO1</i>    | -0.096 | 0.022 | 1.5*10-05  | -0.001 | 0.001 | 0.3115   | 0.011 |
| rs4363584  | 11 | 8286194   | <i>LMO1</i>    | 0.096  | 0.022 | 1.62*10-05 | 0.001  | 0.001 | 0.34372  | 0.013 |
| rs4758332  | 11 | 8286416   | <i>KIRREL3</i> | 0.096  | 0.022 | 1.21*10-05 | 0.001  | 0.001 | 0.34349  | 0.013 |
| rs7131312  | 11 | 126116758 | <i>KIRREL3</i> | 0.12   | 0.025 | 2.26*10-06 | 0.001  | 0.002 | 0.63771  | 0.041 |
| rs13377256 | 11 | 126123588 | <i>KIRREL3</i> | 0.115  | 0.025 | 6.14*10-06 | <.0001 | 0.002 | 0.79648  | 0.061 |
| rs7350493  | 11 | 126124881 | <i>KIRREL3</i> | -0.115 | 0.025 | 6.00*10-06 | <.0001 | 0.002 | 0.79828  | 0.061 |
| rs12361044 | 11 | 126126745 | <i>KIRREL3</i> | 0.116  | 0.025 | 5.94*10-06 | <.0001 | 0.002 | 0.8036   | 0.062 |
| rs11220599 | 11 | 126128143 | <i>KIRREL3</i> | -0.11  | 0.025 | 1.34*10-05 | <.0001 | 0.002 | 0.98941  | 0.089 |
| rs10893564 | 11 | 126131899 | <i>VDR</i>     | -0.115 | 0.026 | 1.16*10-05 | <.0001 | 0.002 | 0.95546  | 0.084 |
| rs886441   | 12 | 46549231  | <i>SLC16A7</i> | -0.14  | 0.028 | 8.63*10-07 | <.0001 | 0.002 | 0.82738  | 0.065 |
| rs11173119 | 12 | 58392780  |                | -0.441 | 0.096 | 4.58*10-06 | 0.002  | 0.005 | 0.65991  | 0.044 |
| rs12297974 | 12 | 58580484  |                | -0.367 | 0.079 | 4.10*10-06 | -0.003 | 0.005 | 0.56173  | 0.033 |
| rs11173245 | 12 | 58607750  |                | 0.366  | 0.079 | 4.14*10-06 | 0.003  | 0.005 | 0.55628  | 0.032 |
| rs11173246 | 12 | 58610763  |                | -0.366 | 0.079 | 4.14*10-06 | -0.003 | 0.005 | 0.55551  | 0.032 |
| rs12313195 | 12 | 58611194  |                | 0.366  | 0.079 | 4.14*10-06 | 0.003  | 0.005 | 0.55523  | 0.032 |
| rs2068673  | 12 | 58619670  |                | -0.337 | 0.077 | 1.25*10-05 | -0.002 | 0.004 | 0.62245  | 0.040 |
| rs12321932 | 12 | 58620991  |                | -0.366 | 0.079 | 4.13*10-06 | -0.002 | 0.005 | 0.59624  | 0.034 |
| rs7135268  | 12 | 58643605  |                | 0.368  | 0.079 | 3.90*10-06 | <.0001 | 0.005 | 0.94026  | 0.081 |
| rs1995516  | 12 | 59006001  |                | 0.338  | 0.077 | 1.26*10-05 | 0.008  | 0.004 | 0.079457 | 0.001 |
| rs2731461  | 12 | 59074329  |                | 0.381  | 0.085 | 8.71*10-06 | 0.006  | 0.005 | 0.19056  | 0.004 |

|            |    |          |               |        |       |            |        |       |         |             |
|------------|----|----------|---------------|--------|-------|------------|--------|-------|---------|-------------|
| rs2655872  | 12 | 59074831 |               | -0.382 | 0.085 | 8.51*10-06 | -0.006 | 0.005 | 0.19064 | 0.004       |
| rs2731462  | 12 | 59074852 |               | -0.383 | 0.085 | 8.32*10-06 | -0.006 | 0.005 | 0.19064 | 0.004264685 |
| rs2731464  | 12 | 59075263 |               | 0.384  | 0.085 | 8.19*10-06 | 0.006  | 0.005 | 0.19072 | 0.004       |
| rs1504445  | 12 | 59075405 |               | -0.384 | 0.086 | 8.07*10-06 | -0.006 | 0.005 | 0.19072 | 0.004       |
| rs1504447  | 12 | 59075721 |               | -0.386 | 0.086 | 7.85*10-06 | -0.006 | 0.005 | 0.19072 | 0.004       |
| rs2047909  | 12 | 59075853 |               | 0.386  | 0.086 | 7.74*10-06 | 0.006  | 0.005 | 0.19073 | 0.004       |
| rs2655874  | 12 | 59075975 |               | -0.391 | 0.086 | 6.95*10-06 | -0.006 | 0.005 | 0.19073 | 0.004       |
| rs2047910  | 12 | 59076152 |               | 0.392  | 0.087 | 6.75*10-06 | 0.006  | 0.005 | 0.19078 | 0.004       |
| rs1504448  | 12 | 59076292 |               | -0.393 | 0.087 | 6.56*10-06 | -0.006 | 0.005 | 0.19081 | 0.004       |
| rs1472738  | 12 | 59076482 |               | 0.396  | 0.087 | 6.12*10-06 | 0.006  | 0.005 | 0.19081 | 0.004       |
| rs2731466  | 12 | 59077481 |               | -0.41  | 0.089 | 4.53*10-06 | -0.006 | 0.005 | 0.19085 | 0.004       |
| rs2655876  | 12 | 59077492 |               | 0.411  | 0.089 | 4.34*10-06 | 0.006  | 0.005 | 0.19085 | 0.004       |
| rs1394325  | 12 | 59077654 |               | 0.416  | 0.09  | 3.89*10-06 | 0.006  | 0.005 | 0.1908  | 0.004       |
| rs2047911  | 12 | 59077994 |               | 0.417  | 0.09  | 3.82*10-06 | 0.006  | 0.005 | 0.19084 | 0.004       |
| rs2655877  | 12 | 59078883 |               | -0.419 | 0.09  | 3.71*10-06 | -0.006 | 0.005 | 0.19092 | 0.004       |
| rs1983091  | 12 | 59080022 | <i>KCNMB4</i> | -0.419 | 0.09  | 3.66*10-06 | -0.006 | 0.005 | 0.19094 | 0.004       |
| rs11178236 | 12 | 69108465 |               | 0.129  | 0.03  | 1.7*10-05  | 0.001  | 0.002 | 0.67652 | 0.046       |
| rs635461   | 12 | 69118847 |               | 0.129  | 0.03  | 1.54*10-05 | 0.001  | 0.002 | 0.70991 | 0.050       |
| rs412528   | 12 | 69120135 |               | -0.132 | 0.028 | 2.87*10-06 | -0.001 | 0.002 | 0.54693 | 0.031       |
| rs381485   | 12 | 69120265 |               | -0.132 | 0.028 | 2.87*10-06 | -0.001 | 0.002 | 0.52686 | 0.030       |

|            |    |           |               |        |       |            |        |       |          |        |
|------------|----|-----------|---------------|--------|-------|------------|--------|-------|----------|--------|
| rs402325   | 12 | 69120298  | <i>PTPRB</i>  | 0.133  | 0.028 | 2.79*10-06 | 0.001  | 0.002 | 0.52443  | 0.029  |
| rs2717426  | 12 | 69273739  |               | 0.106  | 0.023 | 4.19*10-06 | -0.001 | 0.001 | 0.62253  | 0.039  |
| rs2886365  | 12 | 72680307  |               | 0.163  | 0.034 | 1.70*10-06 | 0.001  | 0.002 | 0.69944  | 0.049  |
| rs10744860 | 12 | 114597821 | <i>TPTE2</i>  | 0.096  | 0.021 | 7.05*10-06 | -0.001 | 0.001 | 0.64302  | 0.042  |
| rs2880301  | 13 | 18998534  | <i>USP12</i>  | 0.362  | 0.029 | 1.51*10-32 | -0.001 | 0.002 | 0.71464  | 0.050  |
| rs9512492  | 13 | 26488400  | <i>USP12</i>  | 0.097  | 0.021 | 2.64*10-06 | 0.001  | 0.001 | 0.49404  | 0.026  |
| rs4769538  | 13 | 26505377  |               | -0.092 | 0.021 | 9.87*10-06 | -0.002 | 0.001 | 0.20523  | 0.005  |
| rs4885165  | 13 | 73775656  |               | 0.155  | 0.035 | 1.12*10-05 | -0.001 | 0.002 | 0.59322  | 0.036  |
| rs9593010  | 13 | 74100696  |               | -0.104 | 0.023 | 5.39*10-06 | -0.001 | 0.001 | 0.65683  | 0.043  |
| rs4885212  | 13 | 74101477  |               | -0.106 | 0.022 | 2.41*10-06 | -0.001 | 0.001 | 0.58083  | 0.035  |
| rs1359689  | 13 | 74102084  | <i>RNASE4</i> | 0.106  | 0.022 | 2.35*10-06 | 0.001  | 0.001 | 0.57163  | 0.034  |
| rs17211656 | 14 | 20236989  |               | 0.151  | 0.035 | 1.56*10-05 | <.0001 | 0.002 | 0.90245  | 0.076  |
| rs1431057  | 14 | 33642426  |               | -0.094 | 0.022 | 1.51*10-05 | 0.002  | 0.001 | 0.1232   | 0.002  |
| rs1431056  | 14 | 33644234  |               | -0.095 | 0.021 | 8.07*10-06 | 0.002  | 0.001 | 0.058315 | 0.0004 |
| rs11848011 | 14 | 33644728  |               | 0.096  | 0.021 | 6.48*10-06 | -0.003 | 0.001 | 0.054105 | 0.0004 |
| rs2027338  | 14 | 33656414  |               | 0.102  | 0.023 | 1.12*10-05 | -0.003 | 0.001 | 0.048826 | 0.0003 |
| rs11157257 | 14 | 41500469  |               | 0.108  | 0.025 | 1.36*10-05 | -0.001 | 0.001 | 0.58901  | 0.0362 |
| rs12589908 | 14 | 41509762  |               | 0.108  | 0.025 | 1.38*10-05 | -0.001 | 0.001 | 0.5993   | 0.0369 |
| rs10136607 | 14 | 58316619  | <i>RTNI</i>   | 0.113  | 0.026 | 1.83*10-05 | -0.001 | 0.002 | 0.68596  | 0.047  |
| rs11848964 | 14 | 59163968  | <i>LIPC</i>   | 0.091  | 0.021 | 1.32*10-05 | <.0001 | 0.001 | 0.91854  | 0.078  |

|            |    |          |                  |        |       |            |        |       |          |            |
|------------|----|----------|------------------|--------|-------|------------|--------|-------|----------|------------|
| rs261338   | 15 | 56522297 | <i>LIPC</i>      | 0.129  | 0.03  | 1.71*10-05 | -0.007 | 0.002 | 9.26E-05 | 1.51*10-09 |
| rs473224   | 15 | 56524633 | <i>LIPC</i>      | -0.134 | 0.031 | 1.22*10-05 | 0.007  | 0.002 | 9.67E-05 | 1.48*10-09 |
| rs488490   | 15 | 56524953 | <i>LOC728800</i> | -0.134 | 0.031 | 1.26*10-05 | 0.007  | 0.002 | 0.000106 | 1.75*10-09 |
| rs8031676  | 15 | 94711444 | <i>A2BP1</i>     | 0.093  | 0.021 | 1.5*10-05  | -0.002 | 0.001 | 0.065477 | 0.001      |
| rs17440477 | 16 | 6452734  | <i>RBFOX1</i>    | 0.104  | 0.024 | 1.71*10-05 | -0.002 | 0.001 | 0.096243 | 0.001      |
| rs1024697  | 16 | 6454040  | <i>CNGBI</i>     | 0.108  | 0.024 | 9.16*10-06 | -0.002 | 0.001 | 0.1223   | 0.002      |
| rs193612   | 16 | 56448107 | <i>CNGBI</i>     | 0.169  | 0.035 | 1.17*10-06 | -0.001 | 0.002 | 0.67999  | 0.046      |
| rs247067   | 16 | 56452563 | <i>CNGBI</i>     | 0.169  | 0.035 | 1.20*10-06 | -0.002 | 0.002 | 0.47852  | 0.024      |
| rs247068   | 16 | 56455127 | <i>ZZEF1</i>     | -0.165 | 0.035 | 2.63*10-06 | 0.001  | 0.002 | 0.59346  | 0.036      |
| rs366589   | 16 | 56462677 | <i>ZZEF1</i>     | 0.158  | 0.032 | 1.50*10-06 | -0.003 | 0.002 | 0.18485  | 0.004      |
| rs7215084  | 17 | 3826897  | <i>ZZEF1</i>     | 0.093  | 0.02  | 5.98*10-06 | -0.001 | 0.001 | 0.44293  | 0.021      |
| rs9891113  | 17 | 3827879  | <i>ZZEF1</i>     | -0.093 | 0.02  | 6.23*10-06 | 0.001  | 0.001 | 0.45547  | 0.022      |
| rs8082036  | 17 | 3829362  | <i>MAPT</i>      | -0.093 | 0.02  | 6.36*10-06 | 0.001  | 0.001 | 0.43232  | 0.020      |
| rs11079727 | 17 | 41332609 | <i>SDC4</i>      | -0.122 | 0.027 | 9.80*10-06 | 0.002  | 0.002 | 0.2474   | 0.007      |
| rs4599     | 20 | 43387821 |                  | 0.114  | 0.026 | 1.42*10-05 | <.0001 | 0.002 | 0.8459   | 0.068      |
| rs212600   | 20 | 53488072 |                  | 0.117  | 0.025 | 2.87*10-06 | 0.001  | 0.001 | 0.4449   | 0.021      |
| rs2827800  | 21 | 23337012 | <i>DSCAM</i>     | -0.168 | 0.039 | 1.64*10-05 | 0.003  | 0.003 | 0.24491  | 0.007      |
| rs455772   | 21 | 40884005 |                  | 0.151  | 0.034 | 1.14*10-05 | 0.002  | 0.002 | 0.39302  | 0.017      |

Abbreviations: SE = Standard Error; P= P-value.

<sup>a</sup> +/- 50kb of gene <sup>b</sup>Fishers exact test

**Supplementary Table 4.** Power to reject the null hypothesis, at an alpha level of .05, that SNPs influencing particle diameters in Caucasians also influence particle diameters in non-Caucasian populations, reported for the non-Caucasian populations of MESA.

| Marker               | Effect size in Caucasians ( $\beta$ ) <sup>a</sup> | MESA                          |       |                       |       |                    |       |
|----------------------|----------------------------------------------------|-------------------------------|-------|-----------------------|-------|--------------------|-------|
|                      |                                                    | African Americans<br>(N=1564) |       | Hispanics<br>(N=1422) |       | Chinese<br>(N=758) |       |
|                      |                                                    | MAF                           | Power | MAF                   | Power | MAF                | Power |
| <b>VLDL diameter</b> |                                                    |                               |       |                       |       |                    |       |
| rs10184054           | 0.02                                               | 0.15                          | .71   | 0.26                  | .84   | 0.28               | .59   |
| rs6544366            | -0.04                                              | 0.15                          | .99   | 0.26                  | .99   | 0.27               | .99   |
| rs6728178            | 0.04                                               | 0.20                          | .99   | 0.26                  | .99   | 0.28               | .99   |
| rs7557067            | -0.04                                              | 0.15                          | .99   | 0.26                  | .99   | 0.29               | .99   |
| <b>HDL diameter</b>  |                                                    |                               |       |                       |       |                    |       |
| rs261338             | -0.01                                              | 0.22                          | .99   | 0.14                  | .96   | 0.05               | .40   |
| rs473224             | 0.01                                               | 0.13                          | .96   | 0.10                  | .90   | 0.03               | .27   |
| rs488490             | 0.01                                               | 0.13                          | .96   | 0.10                  | .90   | 0.03               | .27   |

<sup>a</sup>From mixed linear models with log transformed particle diameter as the outcome and marker as the predictor, adjusted for age, sex and study center as fixed effects

**Supplementary Table 5** SNP proxy search for SNPs in LD  $r^2 > .8$  with SNPs replicating across both GOLDN and MESA Caucasian populations

| SNP        | Proxy      | Distance | R <sup>2</sup> |
|------------|------------|----------|----------------|
| rs10184054 | rs6544366  | 148      | <.999          |
| rs10184054 | rs4564803  | 1633     | <.999          |
| rs10184054 | rs6754295  | 2314     | <.999          |
| rs10184054 | rs7557067  | 4343     | <.999          |
| rs10184054 | rs11902417 | 4977     | <.999          |
| rs10184054 | rs6728178  | 9940     | <.999          |
| rs10184054 | rs4665710  | 17166    | 0.904          |
| rs10184054 | rs1042034  | 21412    | 0.904          |
| rs10184054 | rs2678379  | 22691    | 0.904          |
| rs10184054 | rs676210   | 27655    | 0.904          |
| rs10184054 | rs673548   | 33675    | 0.904          |
| rs6544366  | rs10184054 | 148      | <.999          |
| rs6544366  | rs4564803  | 1485     | <.999          |
| rs6544366  | rs6754295  | 2166     | <.999          |
| rs6544366  | rs7557067  | 4195     | <.999          |
| rs6544366  | rs11902417 | 5125     | <.999          |
| rs6544366  | rs6728178  | 10088    | <.999          |
| rs6544366  | rs4665710  | 17018    | 0.904          |

|           |            |       |       |
|-----------|------------|-------|-------|
| rs6544366 | rs1042034  | 21264 | 0.904 |
| rs6544366 | rs2678379  | 22543 | 0.904 |
| rs6544366 | rs676210   | 27507 | 0.904 |
| rs6544366 | rs673548   | 33527 | 0.904 |
| rs6728178 | rs11902417 | 4963  | <.999 |
| rs6728178 | rs10184054 | 9940  | <.999 |
| rs6728178 | rs6544366  | 10088 | <.999 |
| rs6728178 | rs4564803  | 11573 | <.999 |
| rs6728178 | rs6754295  | 12254 | <.999 |
| rs6728178 | rs7557067  | 14283 | <.999 |
| rs6728178 | rs4665710  | 27106 | 0.904 |
| rs6728178 | rs1042034  | 31352 | 0.904 |
| rs6728178 | rs2678379  | 32631 | 0.904 |
| rs6728178 | rs676210   | 37595 | 0.904 |
| rs6728178 | rs673548   | 43615 | 0.904 |
| rs7557067 | rs6754295  | 2029  | <.999 |
| rs7557067 | rs4564803  | 2710  | <.999 |
| rs7557067 | rs6544366  | 4195  | <.999 |
| rs7557067 | rs10184054 | 4343  | <.999 |
| rs7557067 | rs11902417 | 9320  | <.999 |

|           |           |       |       |
|-----------|-----------|-------|-------|
| rs7557067 | rs6728178 | 14283 | <.999 |
| rs7557067 | rs4665710 | 12823 | 0.904 |
| rs7557067 | rs1042034 | 17069 | 0.904 |
| rs7557067 | rs2678379 | 18348 | 0.904 |
| rs7557067 | rs676210  | 23312 | 0.904 |
| rs7557067 | rs673548  | 29332 | 0.904 |
| rs261338  | rs473224  | 2336  | 0.943 |
| rs261338  | rs488490  | 2656  | 0.943 |
| rs261338  | rs573922  | 5089  | 0.891 |
| rs473224  | rs488490  | 320   | <.999 |
| rs473224  | rs573922  | 2753  | 0.945 |
| rs473224  | rs261338  | 2336  | 0.943 |
| rs473224  | rs485671  | 3793  | 0.836 |
| rs488490  | rs473224  | 320   | <.999 |
| rs488490  | rs573922  | 2433  | 0.945 |
| rs488490  | rs261338  | 2656  | 0.943 |
| rs488490  | rs485671  | 3473  | 0.836 |

---



**Supplementary Figure 1** Q-Q plots, and genomic control parameters lambda, for VLDL (panel A), LDL (panel B) and HDL diameters (panel C) an initial genome-wide association analysis with VLDL, LDL and HDL diameters in the GOLDN population (n=817).

Note: Black points represent observed values, red points represent expected values for the null hypothesis.

Panel A VLDL diameter

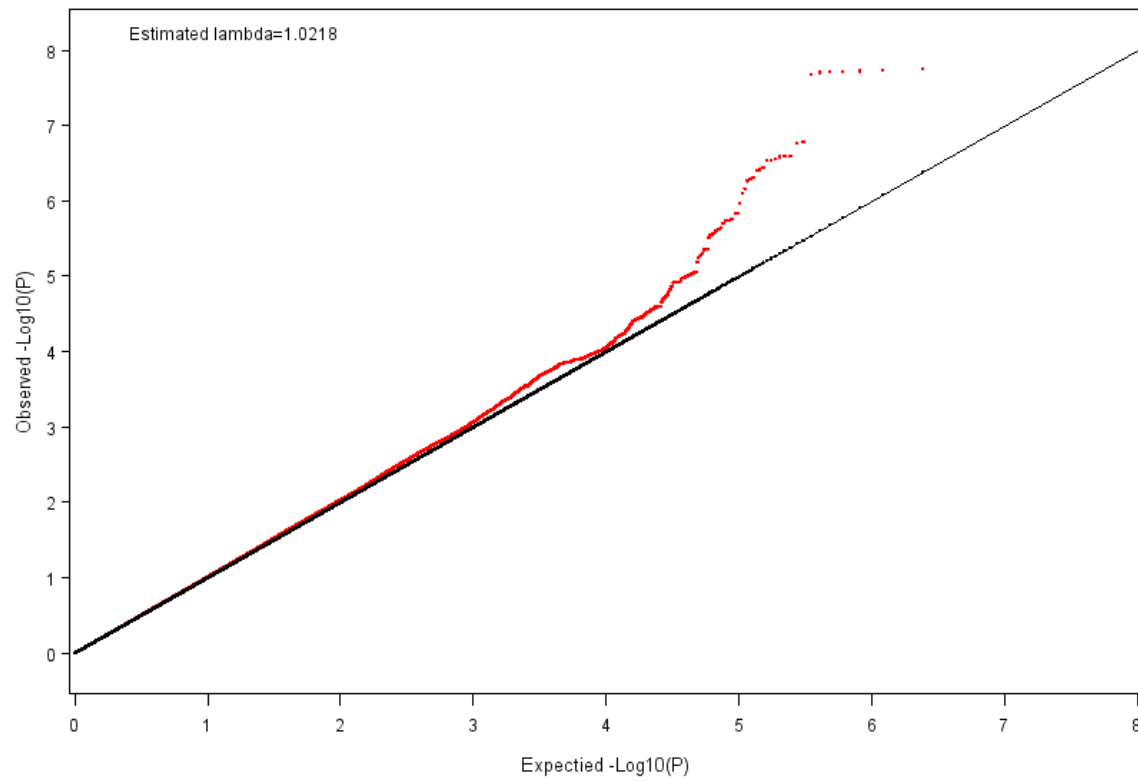

Panel B LDL diameter

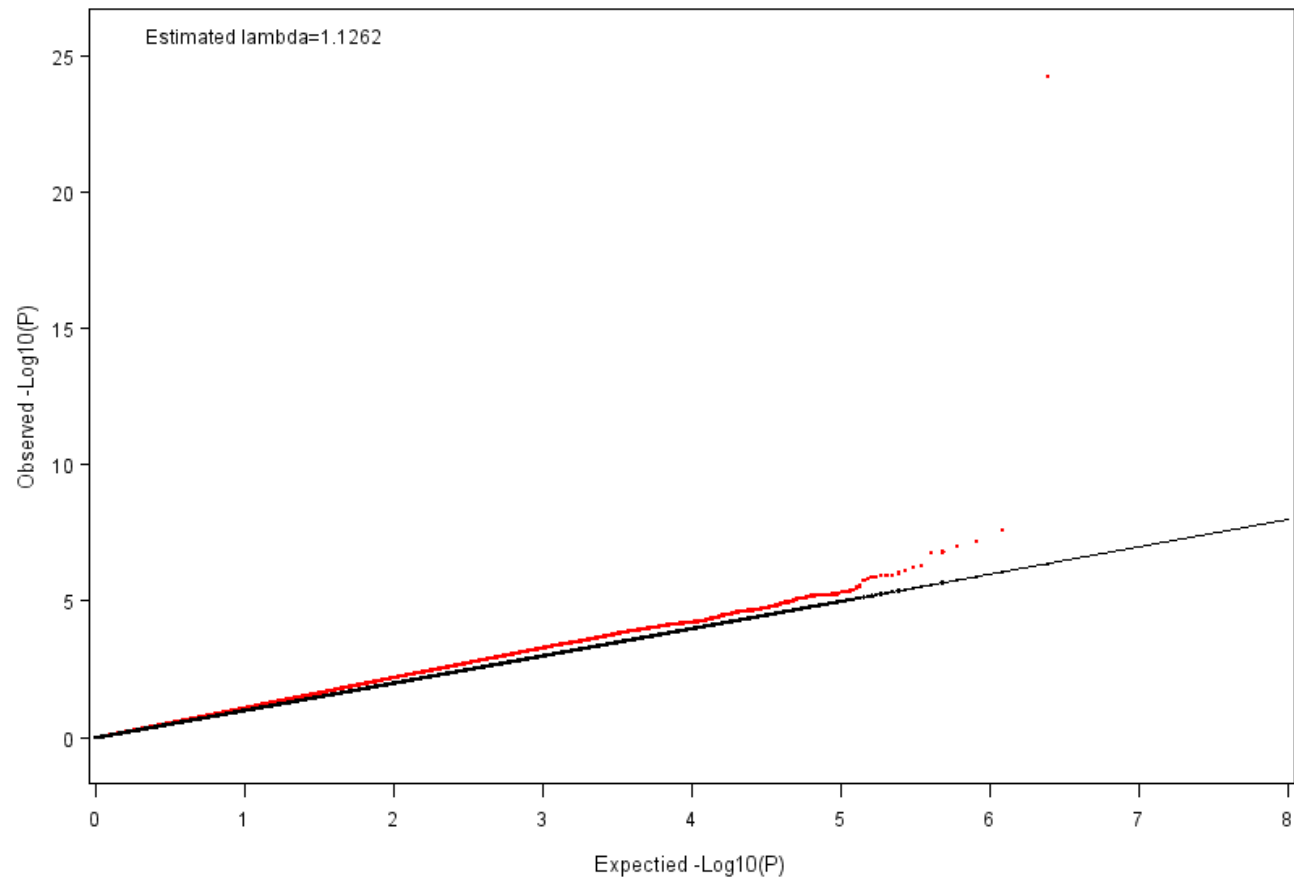

Panel C HDL diameter

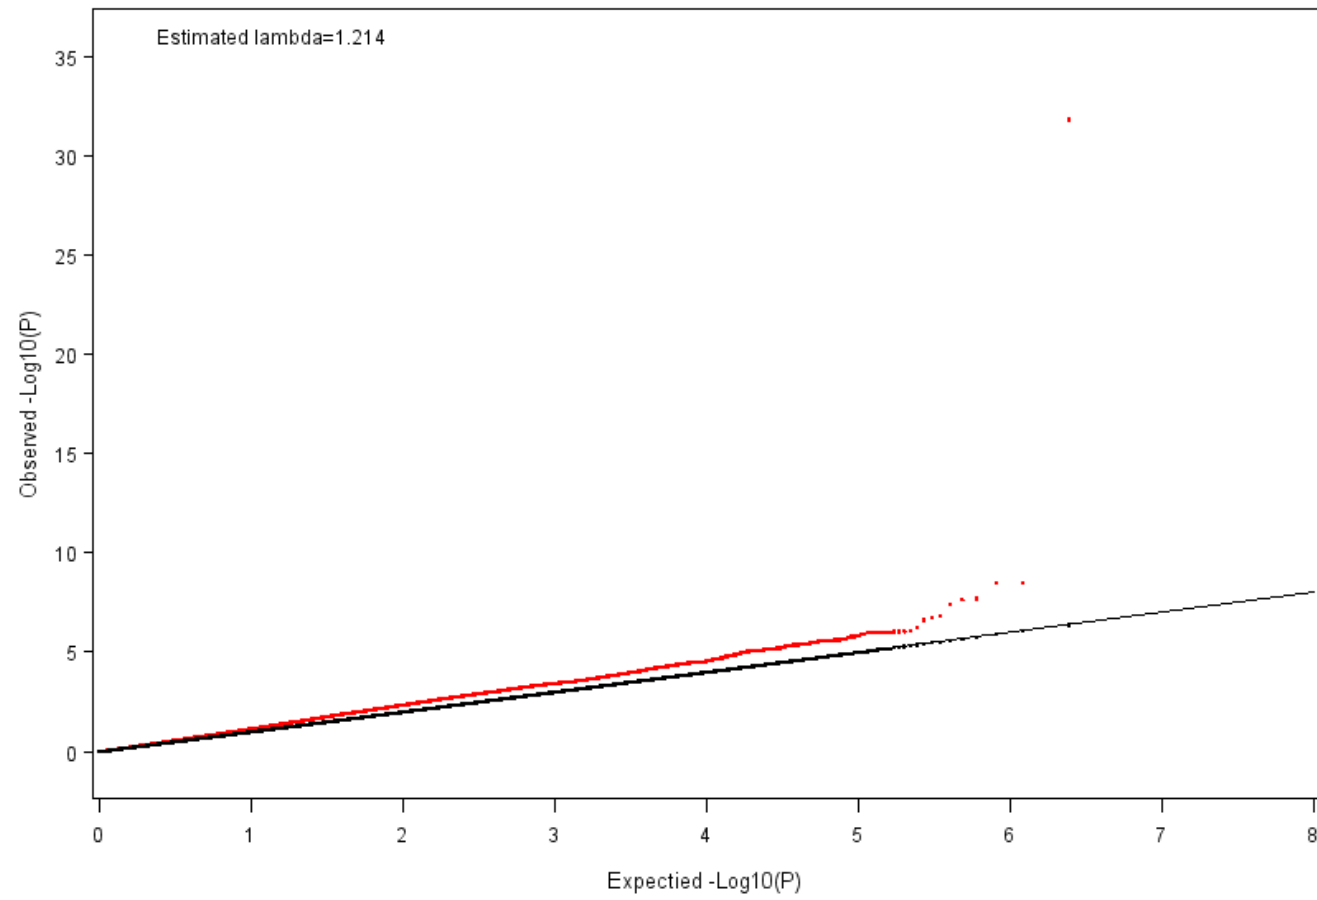

**Supplementary Figure 2** Manhattan plots for VLDL (panel A), LDL (panel B) and HDL diameters (panel C).

Note: For ease of interpretation, rs2880301 has been removed from panels B and C an initial genome-wide association analysis with VLDL, LDL and HDL diameters in the GOLDN population (n=817).

Panel A VLDL diameter

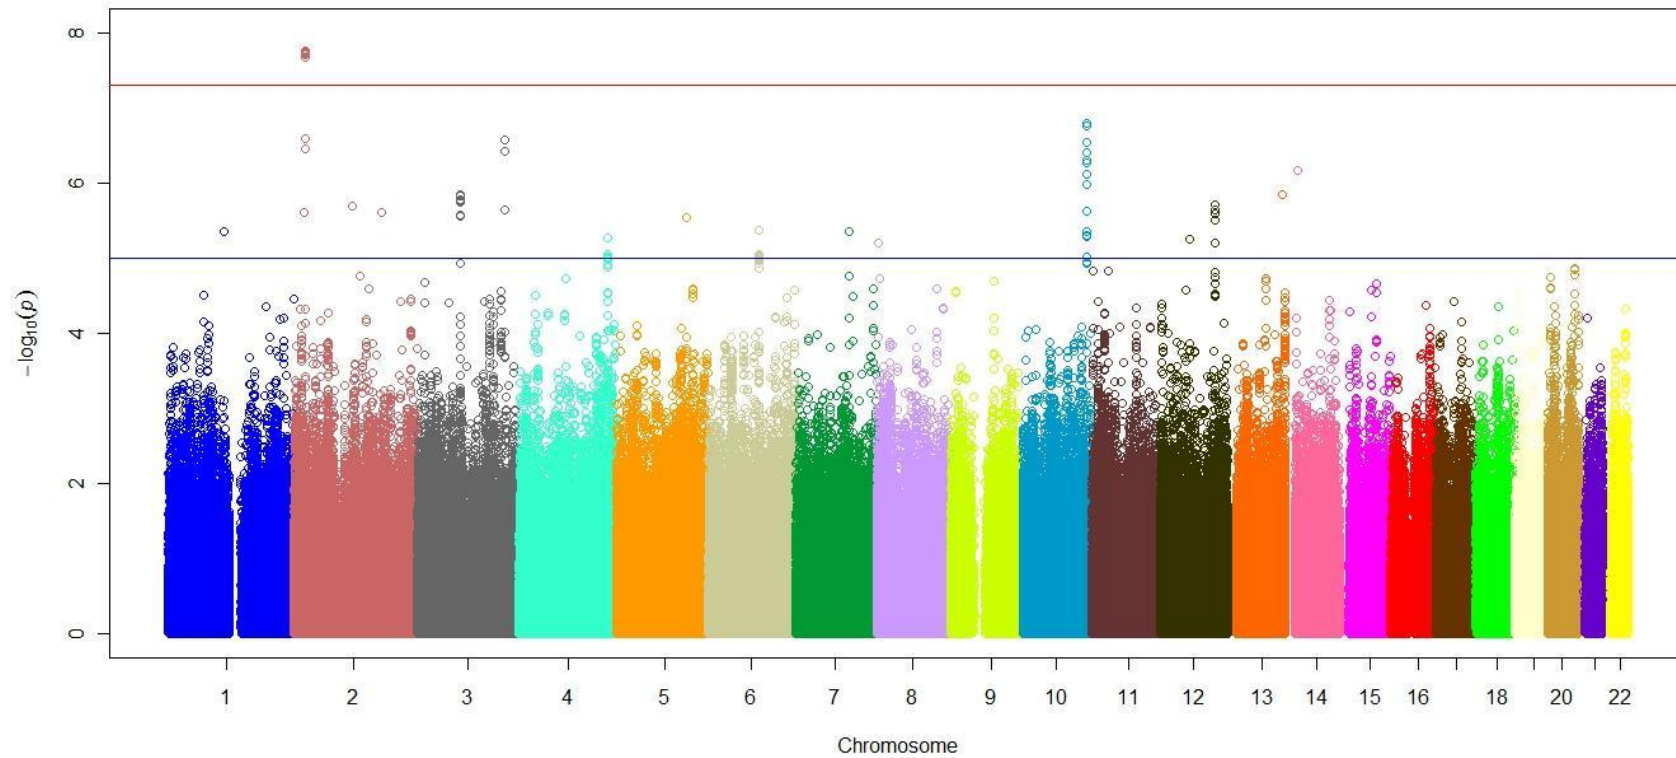

Panel B LDL diameter

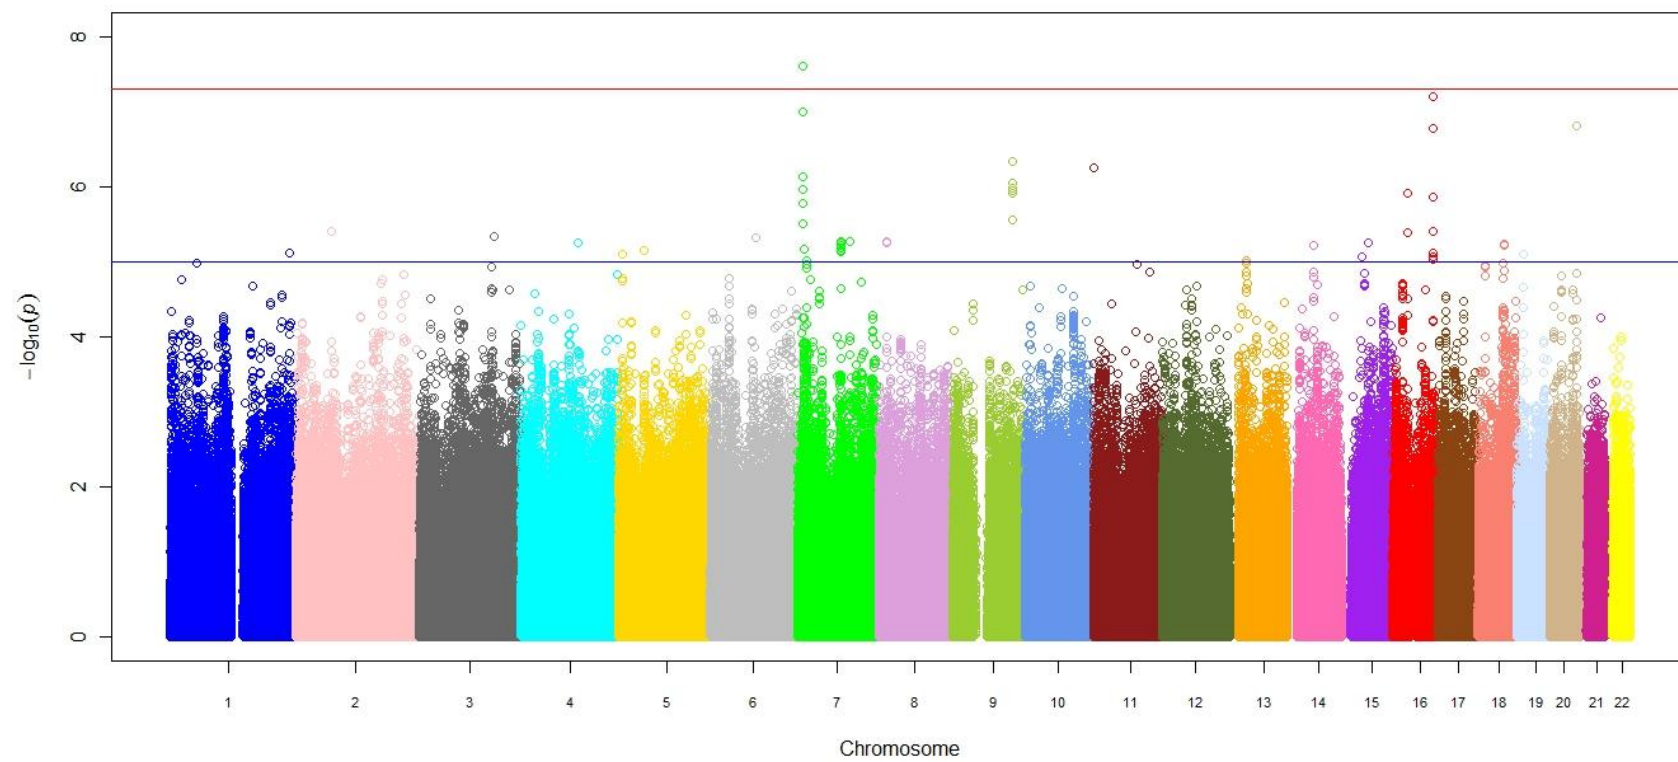

Panel C HDL diameter

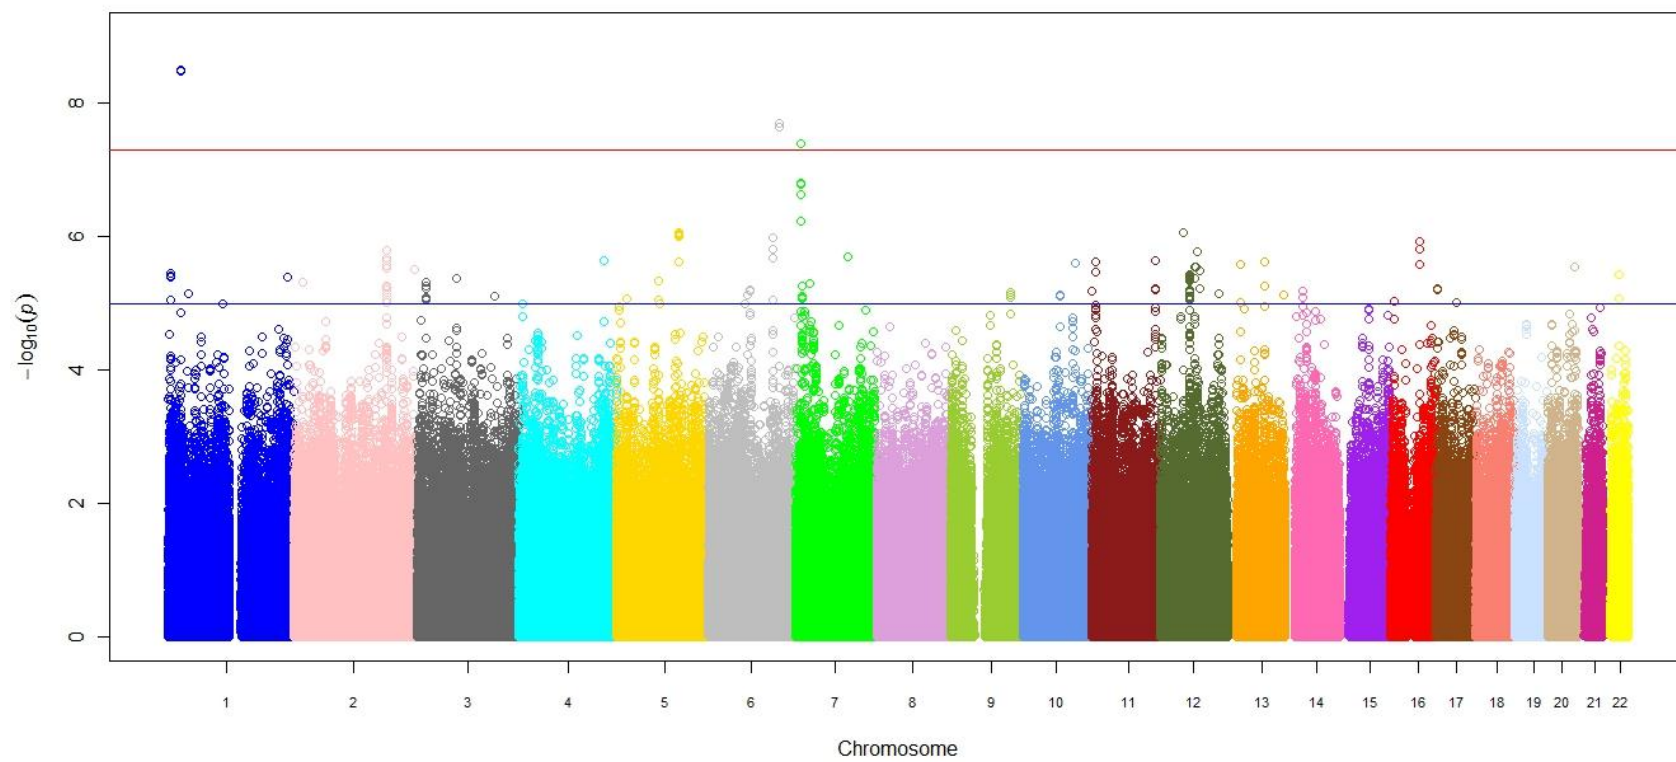

**Supplementary Figure 3** Linkage disequilibrium plots for genotyped SNPs the *APOB* gene, for Caucasian (panel A), Hispanic (panel B), African-American (panel C) and Chinese (panel D) populations of MESA.

Panel A

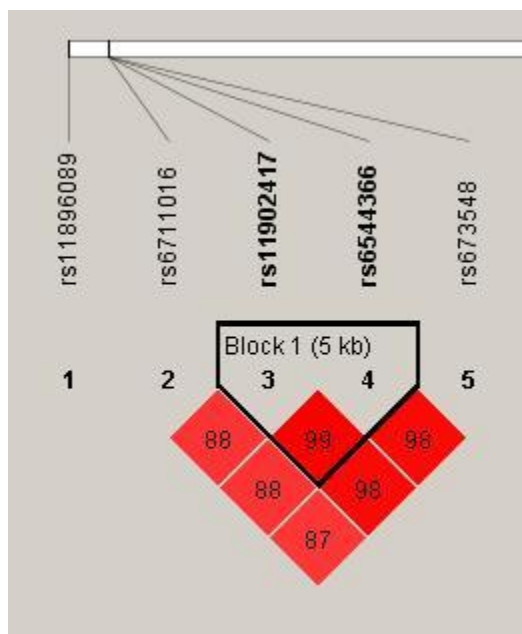

Panel B

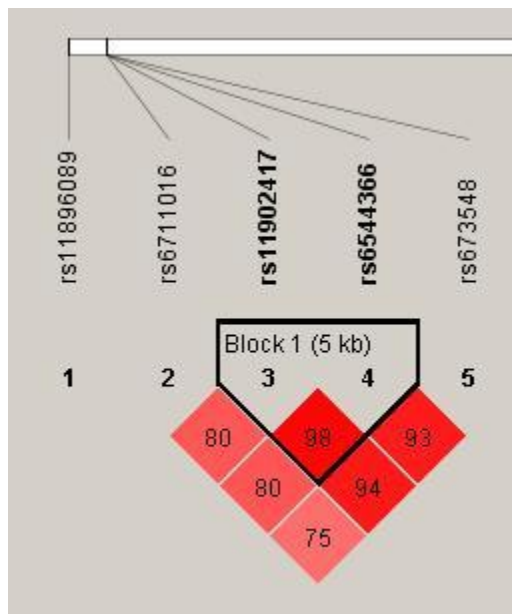



Panel C

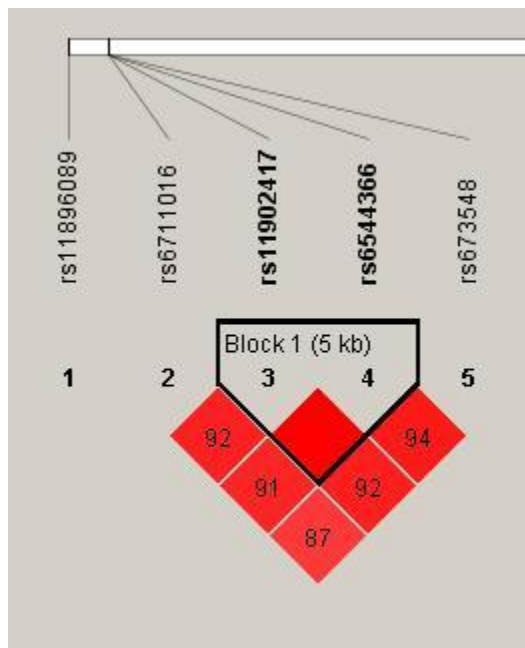

Panel D

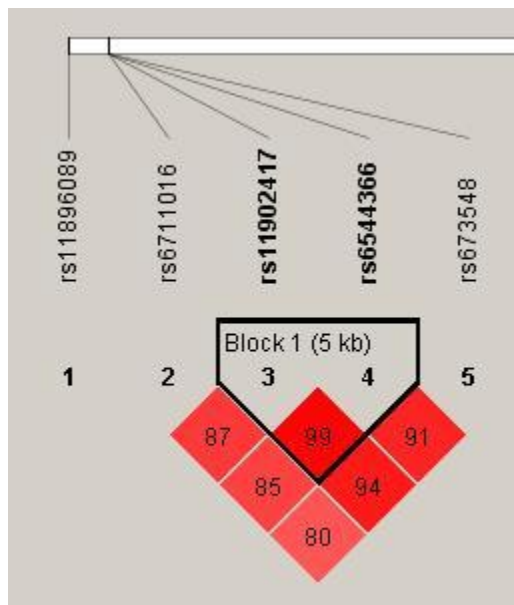

Created using Haploview software (34).
